# Supplementary material for: A Novel Ferroptosis-related Lncrna Prognostic Signature for Colorectal Cancer by Bioinformatics Analysis
Source: Research Square preprint supplement (doi:10.21203/rs.3.rs-257325/v1), 2021-03-11
Supplement: Supplementary file 2 [file 6d98ac744fa990e5ed4a09d5.xlsx]

## Sheet: Sheet1
Table 2 univariate and multivariate Cox regression of clinical features
	clinical features	univariate Cox regression					multivariate Cox regression
		HR	HR.95L	HR.95H	pvalue		HR	HR.95L	HR.95H	pvalue
Train set	Age(continuous variable)	1.01657	0.98955	1.04433	0.231818		1.02582	0.996349	1.05615	0.0865286
	Gender	0.909967	0.492529	1.6812	0.763232		0.776233	0.400144	1.5058	0.453717
	Clinical stage	1.9533	1.39407	2.73686	0.000100034		0.840817	0.27085	2.6102	0.764192
	T stage	4.07135	2.11508	7.83702	2.64707e-05		3.2538	1.56874	6.74886	0.00152626
	Distant metastasis	2.8209	1.46962	5.41464	0.00182559		1.51752	0.344443	6.68572	0.581461
	Lymph-node status	2.19619	1.50751	3.19949	4.16717e-05		1.8691	0.953681	3.66322	0.0684818
	A seven ferroptosis-related lncRNAs signature	1.22359	1.14875	1.30331	3.68999e-10		1.1872	1.10729	1.27288	1.39129e-06
Test set	Age(continuous variable)	1.04575	1.01102	1.08167	0.00942458		1.05365	1.01596	1.09275	0.0049295
	Gender	1.25659	0.636222	2.48188	0.510707		1.24623	0.602095	2.57948	0.553136
	Clinical stage	3.68338	2.41081	5.62769	1.65061e-09		2.59165	0.807981	8.31289	0.109286
	T stage	2.67009	1.452	4.91006	0.00157838		1.10315	0.543518	2.23901	0.78576
	Distant metastasis	10.3249	5.21535	20.4403	2.08684e-11		1.91301	0.378168	9.67723	0.432878
	Lymph-node status	2.32459	1.59017	3.39819	1.3352e-05		0.984777	0.49969	1.94078	0.964651
	A seven ferroptosis-related lncRNAs signature	1.1603	1.01577	1.32541	0.0284948		1.13294	0.995393	1.28949	0.0587524
Entire set	Age(continuous variable)	1.02961	1.00779	1.05189	0.00757197		1.04184	1.01891	1.06527	0.000305745
	Gender	1.05002	0.668971	1.64811	0.831955		0.960154	0.603301	1.52809	0.863824
	Clinical stage	2.58694	1.98979	3.36329	1.26323e-12		1.59336	0.72735	3.49048	0.2443
	T stage	3.27314	2.09397	5.11633	1.9633e-07		1.82068	1.09741	3.02062	0.0203495
	Distant metastasis	5.26706	3.32755	8.33703	1.33175e-12		1.60744	0.55019	4.69629	0.385565
	Lymph-node status	2.24477	1.72164	2.92687	2.32794e-09		1.30851	0.826365	2.07196	0.251523
	A seven ferroptosis-related lncRNAs signature	1.17866	1.12456	1.23537	7.03758e-12		1.12212	1.06668	1.18045	8.33125e-06
