# Supplementary material for: A Novel Ferroptosis-related Lncrna Prognostic Signature for Colorectal Cancer by Bioinformatics Analysis
Source: Research Square preprint supplement (doi:10.21203/rs.3.rs-257325/v1), 2021-03-11
Supplement: Supplementary file 3 [file 0900a443a2c0de495fb41bfa.xlsx]

## Sheet: test
Supplemental Table 5 Complete clinical variable information of patients for univariate and multivariate Cox regression in the test set.
id	futime	fustat	age	gender	stage	T	M	N	riskScore
TCGA-EI-6509	517	0	53	1	3	3	0	2	1.37367
TCGA-AG-3612	608	0	55	0	3	3	0	1	0.459213
TCGA-AA-3688	578	0	80	1	4	3	1	1	1.22093
TCGA-AA-3549	639	0	69	1	1	2	0	0	0.497722
TCGA-AZ-4615	1002	0	84	1	3	3	0	1	0.409235
TCGA-DY-A1DG	1566	1	75	1	4	3	1	1	1.6048
TCGA-A6-5657	367	0	65	1	3	3	0	1	1.04677
TCGA-D5-6930	406	0	67	1	2	3	0	0	0.761042
TCGA-AA-3854	1096	0	71	0	1	2	0	0	0.829396
TCGA-AY-5543	479	0	65	0	4	3	1	1	0.393289
TCGA-F4-6856	591	0	45	1	1	2	0	0	0.544734
TCGA-AD-6895	763	0	84	1	3	3	0	1	0.598708
TCGA-D5-6541	474	0	49	1	2	3	0	0	1.54735
TCGA-D5-5538	373	0	60	0	3	3	0	1	2.52207
TCGA-AA-A00L	1157	0	66	1	2	3	0	0	0.491973
TCGA-G4-6588	796	0	58	0	2	3	0	0	0.377935
TCGA-AG-A016	276	0	55	1	4	3	1	2	0.343052
TCGA-AG-3890	518	0	62	1	1	2	0	0	2.44485
TCGA-AA-A01F	974	0	72	1	3	3	0	1	1.01352
TCGA-D5-6923	378	0	57	1	1	2	0	0	1.28722
TCGA-A6-5660	342	0	73	1	3	3	0	2	0.901344
TCGA-AA-A00N	122	1	75	1	2	4	0	0	0.66087
TCGA-AA-A00Q	1278	0	66	0	3	4	0	1	1.86124
TCGA-AA-3678	1430	0	60	0	3	2	0	1	1.12292
TCGA-CM-4746	699	0	61	1	1	2	0	0	0.380968
TCGA-A6-3810	247	0	62	1	2	3	0	0	1.61692
TCGA-AA-3819	761	0	41	0	2	3	0	0	2.22484
TCGA-AA-3554	546	0	62	0	2	3	0	0	1.55435
TCGA-CM-6167	122	0	57	0	3	3	0	2	2.97629
TCGA-AG-A00C	183	0	49	0	3	3	0	1	1.05198
TCGA-DM-A1D9	4270	0	67	0	2	3	0	0	1.52826
TCGA-EI-6917	531	0	33	1	3	3	0	1	2.17783
TCGA-AA-3662	184	0	80	0	4	4	1	2	2.05157
TCGA-AA-3941	730	0	84	0	4	4	1	1	0.984427
TCGA-AA-3715	579	1	77	1	2	3	0	0	3.88467
TCGA-A6-5666	362	0	78	1	2	4	0	0	2.42693
TCGA-AA-3971	489	0	58	1	3	3	0	1	2.03282
TCGA-CM-5863	304	0	60	0	3	3	0	1	1.49485
TCGA-5M-AAT4	49	1	74	1	4	3	1	0	5.62711
TCGA-D5-6532	555	0	61	1	2	3	0	0	0.250352
TCGA-AA-A00K	549	0	79	1	2	3	0	0	1.89111
TCGA-AA-A00Z	669	0	70	1	2	3	0	0	1.1382
TCGA-AA-A01P	1158	1	80	0	3	3	0	1	1.37936
TCGA-AA-3530	580	0	80	1	1	2	0	0	3.43821
TCGA-AA-3524	1096	0	85	1	2	3	0	0	0.310954
TCGA-AG-3742	30	0	85	0	1	1	0	0	1.41887
TCGA-AA-3821	31	0	81	0	1	2	0	0	6.7179
TCGA-AA-3489	214	1	75	1	2	3	0	0	2.38996
TCGA-AG-3726	243	0	63	0	1	2	0	0	0.51928
TCGA-G4-6293	3275	0	49	0	3	3	0	1	0.535783
TCGA-AG-4022	1400	0	59	0	2	3	0	0	2.98973
TCGA-A6-2674	523	0	71	1	4	3	1	2	2.6316e-06
TCGA-A6-2681	552	0	73	0	2	3	0	0	0.88082
TCGA-AA-A010	1064	0	46	0	2	4	0	0	1.37399
TCGA-CM-5864	61	0	60	1	1	2	0	0	0.735711
TCGA-AA-3869	822	1	76	1	4	4	1	2	1.19166
TCGA-G4-6314	1093	0	76	0	4	3	1	2	1.95211
TCGA-CM-6168	181	0	84	0	2	3	0	0	1.62902
TCGA-QG-A5Z2	952	0	61	1	1	2	0	0	2.70164
TCGA-AA-A02Y	1216	0	73	1	1	2	0	0	0.239656
TCGA-D5-6529	614	0	69	1	2	3	0	0	1.40186
TCGA-CM-6161	212	0	36	0	1	2	0	0	0.888159
TCGA-AA-3950	730	0	79	0	2	3	0	0	0.877009
TCGA-AA-3975	1036	0	80	1	1	2	0	0	2.0277
TCGA-AG-A036	3562	0	71	1	3	3	0	2	1.56547
TCGA-A6-6141	255	0	31	1	2	3	0	0	1.19846
TCGA-AA-A00F	1035	0	66	1	3	3	0	2	0.797514
TCGA-CM-4751	607	0	62	1	3	3	0	1	1.3446
TCGA-AZ-6607	97	1	69	1	4	4	1	2	1.32017
TCGA-AA-3560	608	0	72	0	3	3	0	2	0.808114
TCGA-AA-3663	212	0	42	1	2	3	0	0	0.822089
TCGA-CM-5862	153	1	80	1	4	3	1	1	0.92163
TCGA-4N-A93T	146	0	67	1	3	4	0	1	11.6499
TCGA-AG-3608	485	0	79	0	2	3	0	0	1.22338
TCGA-G4-6315	1117	0	66	1	4	3	1	1	0.960888
TCGA-CM-6679	122	0	58	1	2	3	0	0	3.57858
TCGA-AA-3846	518	0	74	0	2	3	0	0	0.985468
TCGA-F4-6463	415	0	51	1	2	3	0	0	0.732481
TCGA-A6-2685	464	0	48	0	2	3	0	0	1.44893
TCGA-AA-3860	945	0	53	0	3	3	0	1	3.43274
TCGA-AG-4021	121	1	84	0	4	3	1	2	3.26316
TCGA-A6-2682	424	1	70	1	4	4	1	1	0.985071
TCGA-AA-3522	1127	0	67	1	2	3	0	0	1.28926
TCGA-EI-6506	625	0	78	0	2	3	0	0	0.943634
TCGA-DM-A1DA	228	1	71	0	3	3	0	2	1.50759
TCGA-CA-5256	65	0	54	0	2	3	0	0	0.701369
TCGA-AY-4070	496	1	50	0	3	3	0	2	1.81577
TCGA-AA-3994	822	0	69	1	3	3	0	1	1.45769
TCGA-AA-3664	1643	0	74	0	2	3	0	0	9.25821
TCGA-AA-A00D	578	0	70	1	1	2	0	0	1.90285
TCGA-A6-2678	437	0	43	0	3	3	0	1	1.87244
TCGA-G4-6627	1434	0	84	1	2	3	0	0	0.750352
TCGA-AD-6888	472	1	73	1	3	3	0	1	0.40286
TCGA-AZ-6608	59	1	55	0	3	2	0	1	0.661419
TCGA-AD-6548	650	0	81	0	1	2	0	0	1.05937
TCGA-AG-A02X	1247	0	77	1	1	2	0	0	0.356096
TCGA-DY-A1DE	3932	0	56	0	2	3	0	0	1.37367
TCGA-AA-3673	1522	0	53	0	2	3	0	0	0.847752
TCGA-A6-6649	328	0	66	1	3	3	0	1	1.55393
TCGA-CK-4947	534	0	46	0	3	4	0	1	1.41708
TCGA-AG-A023	1581	1	62	0	4	4	1	2	0.833689
TCGA-AA-3552	396	1	85	1	3	3	0	2	1.68256
TCGA-A6-6653	282	0	82	1	1	2	0	0	0.651142
TCGA-D5-6928	354	0	80	1	2	3	0	0	3.05096
TCGA-G4-6304	1631	0	66	0	2	4	0	0	3.50162
TCGA-AA-A01C	457	0	75	1	3	2	0	1	1.84642
TCGA-AA-A01Z	1126	0	68	1	2	3	0	0	1.45139
TCGA-3L-AA1B	349	0	61	0	1	2	0	0	2.18435
TCGA-AA-A02J	153	1	70	0	4	3	1	0	0.685909
TCGA-AA-A02R	670	1	84	0	2	3	0	0	0.939508
TCGA-AA-3681	182	0	77	0	3	3	0	1	0.406143
TCGA-A6-2677	541	0	68	0	3	3	0	2	4.76178
TCGA-DM-A1D6	570	1	88	1	2	3	0	0	3.12169
TCGA-DM-A28M	2895	0	63	1	2	3	0	0	0.509637
TCGA-AA-3947	1004	0	60	0	2	4	0	0	3.13136
TCGA-A6-6654	399	0	65	0	3	3	0	1	1.59536
TCGA-AA-A00W	456	0	80	1	1	1	0	0	0.34596
TCGA-AA-3855	975	0	72	1	1	2	0	0	0.676755
TCGA-A6-6138	280	0	61	1	1	2	0	0	0.766507
TCGA-CI-6624	1466	0	53	0	1	2	0	0	0.925956
TCGA-AA-3968	669	0	55	0	1	2	0	0	2.08383
TCGA-D5-6922	308	0	76	1	3	3	0	1	1.51801
TCGA-AF-2692	412	0	54	0	2	3	0	0	1.06676
TCGA-AA-A01K	943	0	74	0	3	3	0	2	4.58157
TCGA-AA-3952	61	1	68	1	3	3	0	2	7.27704
TCGA-AA-3955	638	0	38	1	3	2	0	2	1.26428
TCGA-AA-3970	1096	0	65	1	2	3	0	0	4.15304
TCGA-CM-4743	184	0	69	1	2	3	0	0	0.482556
TCGA-AA-3877	943	0	83	0	1	1	0	0	0.927447
TCGA-AA-A02H	61	1	74	0	4	3	1	2	1.99
TCGA-D5-6926	275	0	65	1	3	4	0	1	3.13752
TCGA-AG-4008	518	0	63	1	2	3	0	0	1.52287
TCGA-AA-A02K	426	1	50	1	4	4	1	2	7.28915
TCGA-G4-6310	1372	0	69	1	3	3	0	1	0.877435
TCGA-CM-5860	304	0	44	1	2	3	0	0	2.14361
TCGA-AA-3562	608	0	82	1	3	3	0	2	0.638964
TCGA-AA-3531	1035	0	75	0	2	3	0	0	0.770035
TCGA-EI-6513	497	0	59	1	3	3	0	1	1.05753
TCGA-AA-3556	700	0	78	1	1	2	0	0	0.709771
TCGA-EI-6883	350	0	63	1	2	3	0	0	3.96568
TCGA-A6-2680	522	0	72	0	2	3	0	0	0.0733914
TCGA-AA-3520	731	0	86	0	2	3	0	0	0.816013
TCGA-AA-A02E	90	1	82	0	4	3	1	1	3.29662
TCGA-CM-6674	150	0	39	1	2	3	0	0	0.749817
TCGA-AG-3887	1124	0	68	1	2	3	0	0	0.970027
TCGA-CM-4744	214	0	69	1	1	2	0	0	0.996173
TCGA-T9-A92H	362	0	82	1	2	3	0	0	0.487368
TCGA-AA-3980	242	0	89	0	1	2	0	0	0.747076
TCGA-F5-6571	392	0	62	0	2	3	0	0	1.54829
TCGA-AG-A00Y	700	0	68	1	2	3	0	0	0.858897
TCGA-AG-4005	427	0	64	1	4	3	1	2	0.401298
TCGA-EI-6881	499	0	60	1	3	3	0	1	0.702034
TCGA-CK-4952	475	0	48	0	3	4	0	2	0.891167
TCGA-AA-3833	485	0	63	0	2	3	0	0	0.460807
TCGA-AY-A71X	588	0	54	0	1	2	0	0	4.9832
TCGA-CA-5255	93	0	45	1	2	3	0	0	2.69288
TCGA-AG-4007	31	0	87	1	4	4	1	2	1.78281
TCGA-AA-A029	1581	0	67	1	2	3	0	0	0.68615
TCGA-5M-AAT6	290	1	40	0	4	4	1	2	1.75501
TCGA-DM-A28K	2988	0	75	1	2	3	0	0	1.20776
TCGA-AA-3939	395	0	83	1	2	3	0	0	3.18266
TCGA-DM-A28H	3561	0	50	1	3	3	0	2	6.28263
TCGA-AA-3679	457	0	59	1	4	3	1	2	0.820265
TCGA-F5-6861	449	0	60	0	2	3	0	0	0.632383
TCGA-D5-6540	491	0	66	1	1	2	0	0	1.91896
TCGA-AG-3894	426	0	65	1	2	3	0	0	0.759631
TCGA-F4-6569	409	0	60	1	1	2	0	0	1.73337
TCGA-A6-5661	306	0	80	0	2	3	0	0	0.474155
TCGA-AG-A02N	1885	0	67	1	2	3	0	0	2.59767
TCGA-DM-A28E	3648	0	72	0	2	3	0	0	0.305752
TCGA-AG-A008	424	0	50	0	1	2	0	0	0.742282
TCGA-EI-7002	364	0	58	1	4	3	1	2	2.53005
TCGA-AF-2690	358	0	76	0	3	3	0	2	3.78606
TCGA-AA-3875	549	0	78	0	1	1	0	0	2.93588
TCGA-D5-6920	377	0	77	0	2	3	0	0	0.459279
TCGA-AA-3842	1126	0	51	1	3	2	0	1	1.72631
TCGA-AD-6965	805	0	62	1	3	4	0	2	0.621449
TCGA-AA-3815	1005	0	65	0	2	3	0	0	1.15983
TCGA-D5-5539	596	0	60	1	3	3	0	1	1.03341
TCGA-NH-A6GC	389	0	66	0	4	4	1	1	13.9911
TCGA-DM-A1D7	405	1	82	1	2	3	0	0	1.17363
TCGA-AA-3812	1066	0	82	0	2	3	0	0	0.879162
TCGA-D5-6932	346	0	69	1	2	3	0	0	0.607097
TCGA-AG-3898	1461	0	61	1	2	3	0	0	0.816233
TCGA-AA-3844	454	0	78	0	3	3	0	2	1.09458
TCGA-F4-6809	403	1	52	0	4	3	1	1	3.12324
TCGA-AA-3511	212	0	64	1	2	4	0	0	0.754012
TCGA-A6-6650	278	0	69	0	2	3	0	0	9.55243e-06
TCGA-DM-A28F	1094	1	73	1	3	3	0	1	2.57966
TCGA-AA-A03J	1246	0	65	0	1	2	0	0	0.605402
TCGA-CM-6170	242	0	73	0	1	2	0	0	1.53014
TCGA-AA-3837	1186	0	67	1	2	3	0	0	4.42738
TCGA-AG-3584	730	1	60	1	4	3	1	2	2.0259
TCGA-5M-AATE	1200	0	76	1	2	3	0	0	0.689579
TCGA-AG-3728	912	0	73	1	3	3	0	1	0.365133
TCGA-AA-3930	61	1	66	1	4	3	1	2	1.42432
TCGA-CM-6677	153	0	75	0	2	3	0	0	0.954454
TCGA-A6-6648	344	0	56	1	4	3	1	0	0.639949
TCGA-CM-4747	244	0	47	1	4	4	1	1	0.847993
TCGA-DM-A28G	1849	1	75	1	2	3	0	0	1.57759
TCGA-AG-3892	396	0	57	0	1	1	0	0	1.38635
TCGA-CM-6166	424	0	48	0	1	2	0	0	3.57379
TCGA-AA-A00J	549	0	80	1	3	4	0	1	2.08015
TCGA-AA-3841	1124	0	66	1	2	3	0	0	0.555283
TCGA-CA-5254	68	0	42	0	2	3	0	0	5.14518
TCGA-AA-3544	426	0	68	1	1	2	0	0	0.84931
TCGA-DM-A0X9	3641	0	71	0	2	3	0	0	1.21321
TCGA-AA-3514	31	0	81	0	1	2	0	0	0.386425
TCGA-A6-6140	356	0	62	1	2	3	0	0	0.379771
TCGA-D5-6530	621	0	53	1	1	2	0	0	0.870671
TCGA-AA-A00O	822	0	83	0	3	3	0	2	1.37916
TCGA-AA-3979	730	0	84	1	2	3	0	0	0.846457
TCGA-AZ-4315	1776	0	61	1	2	3	0	0	0.335459
TCGA-AZ-5407	1868	0	51	0	1	1	0	0	1.28815
TCGA-AA-3864	1612	0	71	1	2	3	0	0	0.538923
TCGA-AA-3532	882	0	63	1	2	3	0	0	0.350183
TCGA-AA-3495	1127	0	79	1	1	2	0	0	1.07221
TCGA-AZ-4616	156	1	82	0	4	3	1	2	2.86367
TCGA-CM-4748	214	0	53	1	3	4	0	1	1.31719
TCGA-G4-6299	2268	0	69	1	3	3	0	2	1.73847
TCGA-AG-A015	1096	0	64	0	1	1	0	0	0.425582
TCGA-DM-A1D4	2821	1	80	1	2	3	0	0	3.08883
TCGA-AG-A026	59	1	66	1	2	4	0	0	2.18022
TCGA-AA-3989	242	1	84	1	4	3	1	2	0.550687
TCGA-F4-6460	407	0	51	0	3	3	0	1	1.90663
TCGA-AG-A02G	1185	1	66	1	4	2	1	1	1.9063
