# Supplementary material for: A Novel Ferroptosis-related Lncrna Prognostic Signature for Colorectal Cancer by Bioinformatics Analysis
Source: Research Square preprint supplement (doi:10.21203/rs.3.rs-257325/v1), 2021-03-11
Supplement: Supplementary file 4 [file 1eeeed28fc4dd75fc7580d03.xlsx]

## Sheet: Sheet1
Table1 Summary of clinical information for CRC patients
Variables	Case (Total=548)	Percentage
Gender
Male	292	0.532847
Female	256	0.467153
Age (years)
Range	31-90
Median	68
Race
ASIAN	12	0.0218978
BLACK	59	0.107664
AMERICAN INDIAN	1	0.00182482
WHITE	252	0.459854
unknow	224	0.408759
Clinical Stage
Stage I	96	0.175182
Stage II	210	0.383212
Stage III	149	0.271898
Stage IV	78	0.142336
unknow	15	0.0273723
T stage
T1+Tis	16	0.0291971
T2	96	0.175182
T3	373	0.680657
T4	63	0.114964
Lymph node status
N0	323	0.589416
N1	130	0.237226
N2	94	0.171533
Nx	1	0.00182482
Metastatic
M0	408	0.744526
M1	77	0.140511
Mx+unknow	63	0.114964
MMR		0
Yes	34	0.0620438
No	213	0.388686
unknow	275	0.501825
MMR
dMMR	55	0.100365
pMMR	358	0.653285
unknow	135	0.24635
KRAS mutation status
Yes	53	0.0967153
No	450	0.821168
unknow	45	0.0821168
BRAF mutation status
Yes	31	0.0565693
No	459	0.837591
unknow	58	0.105839
Perineural invasion
Yes	53	0.0967153
NO	153	0.279197
unknow	342	0.624088
Vascular invasion
Yes	119	0.217153
NO	351	0.640511
unknow	78	0.142336
CEA levels
<=5	224	0.408759
>5	121	0.220803
unknow	203	0.370438
Tumor status
WITH TUMOR	258	0.470803
TUMOR FREE	225	0.410584
unknow	65	0.118613
History of colon polyps
Yes	155	0.282847
No	312	0.569343
unknow	81	0.14781
