# Supplementary material for: A Novel Ferroptosis-related Lncrna Prognostic Signature for Colorectal Cancer by Bioinformatics Analysis
Source: Research Square preprint supplement (doi:10.21203/rs.3.rs-257325/v1), 2021-03-11
Supplement: Supplementary file 5 [file 66e2f77a383bc833b6269e31.xlsx]

## Sheet: 04.test
Supplemental Table 3 Survival information of differentially expressed ferroptosis-related lncRNA in test set
id	futime	fustat	AP002387.2	UBE2R2-AS1	AC004816.1	ZKSCAN2-DT	AL031186.1	AC010834.3	MIR100HG	AC026356.1	MED8-AS1	AC145423.2	PIK3IP1-AS1	AC092168.2	SCARNA9	PCAT6	AL161891.1	AC018521.6	AP001453.4	ZFAS1	AL035461.3	LINC01871	LINC02418	AC005261.1	PABPC4-AS1	AL078587.1	AL157786.1	AC092338.1	LINC02323	AC084125.4	AC091057.1	AL355075.2	MIR181A2HG	AC008649.2	RHPN1-AS1	AC078860.2	AC093585.1	ABALON	LINC01569	AL121899.1	SNHG1	AGAP2-AS1	AC009065.6	AC015922.3	AC016394.3	AC093788.1	SNHG11	SCAT2	AL109615.3
TCGA-EI-6509	1.41644	0	3.23208	0.112295	4.5663	0.880489	0.802035	1.89568	1.29905	0.709416	0.22363	0.151998	0.846862	0.101332	0.0514553	1.91842	0.595532	0.813301	0.958227	202.943	3.77833	0	2.04477	8.16046	0.626336	0.636736	0.392698	0.171761	0.31727	0.48365	1.3607	0.569992	0.987756	0.300227	0.473507	2.10244	0.29707	0.496329	1.05622	1.03127	8.5209	7.10807	13.8971	2.23756	0.529775	0.195941	4.97194	0.345976	0.553772
TCGA-AG-3612	1.66575	0	30.5716	0.360212	1.1067	0.553651	0.968549	0.744591	0.550142	0.274791	0.637639	0.390054	0.74938	0.130018	3.69722	4.18979	0.412224	0.556554	1.47539	46.8816	1.24534	0	3.53447	3.09794	0.0845942	0.429995	0.315857	0	1.48296	1.79275	0.350195	0.877621	0.42246	0.385218	1.99277	0.0884467	1.08905	0.930759	1.25255	1.19517	22.1888	2.70346	13.217	1.75637	0.436982	0.301692	8.1193	1.01467	0.669938
TCGA-AA-3688	1.58356	0	2.77396	0.242954	1.53679	1.16064	1.42901	0.544059	0.336823	0.376471	0.107518	1.15098	0.694978	0.164426	1.00193	3.17915	0.48317	0.117307	1.3821	43.8706	6.97461	2.26407	1.44404	7.39257	0.285284	0.362526	0.418467	0	0.294182	0.930126	0.860068	0.493278	0.237449	0.162388	1.02445	0.149138	0.826356	0.474961	2.02548	5.03818	13.6538	2.14828	30.858	0.455627	2.16957	0.0847849	8.03279	0.534664	0.804442
TCGA-AA-3549	1.75068	0	9.04726	0.757941	2.55281	0.715581	0.810558	0.379814	0.275615	0.229967	0.609859	0.18653	0.860078	0.18653	2.02066	3.2058	0.509659	0.39923	0.679424	87.0347	2.38218	3.66919	1.99799	4.56486	0.0809087	0.74027	0.273325	0	0.917756	1.05516	0.441729	0.652856	0.0673424	0	1.06919	1.01512	0.520803	0.773076	1.08015	0.163299	14.6703	4.785	24.7587	0.581487	0.882326	0.288548	5.78456	0.667194	0.718417
TCGA-AZ-4615	2.74521	0	2.56598	0.599302	0.866477	0.398329	1.51071	0.33035	1.13867	0.971515	0.424349	0	0.374034	0.432635	3.29531	1.35059	0.0920025	1.5047	1.18188	42.578	1.47996	3.82962	1.44953	4.40748	0.140744	0.286161	0.237729	0	0.2177	0.917748	0.586858	0.567833	0.820012	0	0.0808652	0.662189	0	1.52817	0.341629	0.0710162	12.832	5.97133	6.96126	1.2363	0.646248	0.376455	2.04006	0.633059	0.540416
TCGA-DY-A1DG	4.29041	1	15.2343	0.102637	2.56597	2.84952	1.49485	0.966505	0.0590939	0.946094	0.787303	0.277849	0.427048	0.185233	1.69307	2.2384	0.487015	0.528605	1.3494	121.049	2.87252	1.18419	1.61736	8.1097	0.361557	1.59276	0.592847	0.156988	2.37509	0.589402	0.747164	0.555699	0.0334371	0.182937	0.161572	0.294018	0.775771	0.232636	5.76299	0.608113	23.1431	1.07725	17.3072	0.256642	2.00601	2.02967	7.66435	2.4394	2.40056
TCGA-A6-5657	1.00548	0	1.0894	0.157152	2.06925	0.46164	0.980932	0.804385	1.08782	1.14533	0.476892	0.364653	0.490405	0.101292	0.411482	1.86055	0.294517	0.650388	1.192	36.7828	1.05336	1.31505	0.00308524	7.17397	0.817215	0.133997	0.365594	0.343388	0.117797	0.902462	0.827172	0.698918	0.175533	0.240088	0.514975	0.881994	0	0.26715	1.36935	0.159619	11.331	7.49507	9.13926	1.47358	0.907833	0.611098	2.06029	0.434772	0.297339
TCGA-D5-6930	1.11233	0	5.65795	0.0831683	0.713958	0.492322	0.419298	0.487097	0.846805	0.594804	0.368057	0.112573	0.173022	0.0375243	0.38109	1.2999	0.319192	0.321253	1.35629	35.0736	2.20785	6.97536	2.38304	4.60632	0.0976586	0.397121	0.156273	0.12721	0.537092	0.159201	0.870075	0.506579	0.162568	0.111177	0.603187	0.459477	0.125724	0.537251	1.32747	0.788423	7.42107	9.09387	19.637	0.857839	0.588546	0.31926	2.19027	0.292843	0.410136
TCGA-AA-3854	3.00274	0	14.0935	0.512735	1.69885	0.354991	0.670181	0.157018	0.139837	0.353117	0.100848	0	0.237041	0.257043	1.46187	4.39006	0.0795081	0.440119	1.64206	35.6603	1.12549	0.758435	0.258364	4.72652	0.0668964	0.204022	0.249777	0	0.137966	0.436212	0.385296	0.53979	0.334078	0	0.442012	0.139886	0	0.32928	0.876844	0.135018	6.9186	6.73308	17.0075	0.694463	0.537541	0.516914	2.93517	0.351047	0.224756
TCGA-AY-5543	1.31233	0	3.93314	0.133347	0.915772	0.642564	0.53782	0.716664	0.0727346	0.43233	0.826166	0.288788	0.527084	0.168459	0.977624	2.96632	0.442915	0.103015	2.44767	53.1653	1.51476	5.0416	7.561	5.70981	0.0939477	0.318359	0.462139	0.122376	0.742732	0.459454	0.426492	0.613674	0.886212	0.213906	1.34046	0.130968	0.120947	0.43523	1.37584	0.379232	15.4818	2.51924	37.1158	1.67549	1.36603	0.428119	3.44733	0.633859	1.1799
TCGA-AD-A5EK	1.36986	0	3.94008	0.555844	2.46116	1.15451	1.40116	1.83837	0.3234	0.82156	0.713359	0.67713	0.982915	0.100316	1.93569	2.20224	0.543015	0.375734	1.34914	195.36	3.77475	2.36794	26.0404	10.1014	0.489516	1.42658	1.19529	0.255058	0.134609	1.33	1.76017	2.82138	0.950687	0	1.10627	1.43307	4.24331	1.30397	2.53485	3.55679	30.5821	1.93002	15.4473	0.443024	2.13531	0.717711	10.5729	0.587153	0.751842
TCGA-F4-6856	1.61918	0	2.69233	0.221933	0.501364	0.437917	0.372963	0.611675	0.277417	0.317445	0.589292	0.300399	0.461707	0.0500665	0.101693	2.01672	0.30973	0.535787	1.34669	45.2122	1.78118	3.84091	0	4.41766	0.19545	0.397392	0.12742	0.169729	0.134364	0.424825	0.996724	0.375499	0.433809	0	0.411757	0.0681171	0.0838731	0.471593	1.20186	0.131493	6.91958	20.0788	14.1543	2.34115	0.860049	0.232348	2.53951	0.341883	0.797379
TCGA-AD-6895	2.09041	0	3.29721	0.31825	1.88525	0.323165	0.831949	0.170554	0.585065	0.826125	0.876335	0.0957264	0.0735646	0.127635	0.453683	0.565539	0.11844	1.50248	1.87749	35.7	3.53658	4.33093	3.92649	4.92712	0.332176	0.379903	0.561076	0.216346	7.62144	0.338441	1.39504	0.430769	0.207359	0.189079	0.202782	0.607781	0.320728	3.3302	1.61259	0.586631	16.3244	4.98754	21.6886	1.22682	1.02477	0.567646	3.15567	0.404656	0.757306
TCGA-D5-6541	1.29863	0	4.27772	0.0725145	3.29816	0.577362	1.05614	0.849401	1.39096	0.633857	0.556242	0.981525	0.226287	0.065435	0.753152	1.75719	0.0607208	0.653569	1.26505	28.0079	0.775979	1.99509	2.84677	7.08859	0.539275	0.375104	0.615668	0.0369716	0.439023	0.370153	0.487015	0.588915	1.67729	0	1.22307	0.830913	0.401936	0.271196	2.7351	0.143214	11.4378	6.96455	14.0908	2.58383	0.423555	0.64108	3.10778	0.361718	0.429118
TCGA-D5-5538	1.02192	0	2.6152	0.108497	1.04577	0.46573	0.303885	0.573143	0.792357	0.62076	0.448138	0.0979045	0.48905	0.0326348	0.331433	4.23289	0.560248	0.279393	1.86535	51.764	0.625169	1.15552	8.17083	3.09938	0.1274	0.431719	0.626696	0	0.569288	0.41537	0.379625	0.195809	0.212077	0.193382	2.40336	0.488408	0.874736	0.577909	0.700945	1.32852	14.4096	3.08869	9.97214	1.18691	1.87681	0.176693	3.11102	0.413863	1.55927
TCGA-AA-A00L	3.16986	0	14.1037	0.63077	0.997471	1.16275	0.927519	0.86924	0.143357	0.375929	0.418716	0.640337	0.820153	0.0711486	5.78057	1.89151	0.594204	0.456838	1.79415	78.4649	3.21268	1.88939	1.96122	6.52944	0.555501	0.470604	1.08645	0.241199	0.6683	0.60371	1.33866	0.106723	0	0	0.398959	0.483999	0.595952	0.750593	1.28096	1.7752	19.1097	0.918243	5.30678	2.73551	2.71009	0.605339	4.31611	0.485843	0.71099
TCGA-G4-6588	2.18082	0	1.14754	0.339207	0.578979	0.641923	0.443368	0.908928	0.284386	0.808648	0.467022	0.408121	0.352841	0.10203	0.75988	0.383588	0.583857	0.655126	1.71526	34.1589	3.49025	1.30456	1.32078	8.28685	0.132769	0.224956	0.180981	0.230593	0.578065	0.216437	1.56391	1.27538	0.147343	0	0.4577	0.231359	0.11395	1.93493	0.687513	0.312631	20.4639	7.36434	6.66911	0.565455	1.77809	0.420888	2.22787	0.82943	1.15766
TCGA-AG-A016	0.756164	0	4.02578	0.0881482	1.51342	1.20838	1.18508	0.850316	0.0400674	0.420279	0.546133	0.238627	0.550147	0.159085	4.8469	2.11467	0.639702	0	1.67151	47.2172	1.52375	0	2.73773	4.79507	0	1.2627	0.128823	0.134827	1.88565	2.69974	0.80729	0.715882	0.172302	0	0.594702	0	0.266504	1.0789	1.4572	0.626724	12.2992	2.01513	28.7073	0.49593	0.891123	0.184569	7.05549	0.232783	0.720351
TCGA-AG-3890	1.41918	0	7.03689	1.08472	0.980185	1.98674	2.32004	0.883295	0.457195	0.564195	0.436396	1.0678	1.43604	0	6.50663	4.87469	0.33029	0.380902	1.79511	37.689	2.92219	2.10045	1.07058	4.06062	0.231583	1.17714	1.07056	0.15083	1.03483	2.45389	0.910055	1.6017	0.192753	1.05456	1.46363	0	0.149068	1.34106	2.10797	1.28537	19.0248	3.19006	20.0181	2.95889	1.99378	1.03238	10.3651	0.60763	1.6117
TCGA-AA-A01F	2.66849	0	3.62628	0.324361	1.39224	1.02741	0.681368	0.558737	0.0884621	0.734592	0.287088	1.53664	1.01219	0.0731735	8.17449	3.18329	0.486629	0	0.615069	64.535	1.10137	2.37498	7.99016	5.77883	0.0952184	1.06479	0.541753	0.372095	0.589131	2.17312	0.616971	0.10976	0	0	0.246188	0.19911	1.34841	0.799525	1.94145	0.768723	9.24709	3.56765	26.8489	0.22811	1.63954	0.848954	6.80763	0.571052	0.685523
TCGA-D5-6923	1.03562	0	5.11852	0.0978106	1.78979	0.751682	1.35607	1.8365	0.800269	1.01431	0.757497	0.728157	0.432403	0.198588	0.851548	1.59986	0.501654	0.377812	1.85473	53.4298	0.573658	1.23702	5.38004	4.42895	0.516834	0.0583796	0.847456	0.261811	0.562564	0.655302	1.46081	0.893648	0.0716958	0.130751	0.494918	0.510351	0.406611	1.12234	1.97935	0.260784	16.8529	5.08377	12.0249	3.27882	2.63681	0.170667	5.73668	0.538125	0.399656
TCGA-A6-5660	0.936986	0	7.94929	0.195052	2.29132	0.506416	0.600947	0.694385	0.975262	0.58899	0.172639	0.17601	0.405784	0.0880048	0.29792	3.47401	0.617021	0.188357	1.67673	51.0122	2.1274	0.779005	5.3387	3.84801	0.0381727	0.892551	0.60405	0.149171	0.249301	0.560054	0.529035	0.836045	0.285949	0	1.44754	1.0776	0.982857	0.740526	2.28863	0.385222	12.7509	5.79113	26.4679	3.96277	1.24884	0.317653	4.45636	0.286165	0.742023
TCGA-AA-A00N	0.334247	1	3.59681	0.429575	1.00926	0.749488	1.29944	0.295991	1.03098	0.204816	0	0.465163	0	0	0.629881	2.99795	0.155874	0.663726	1.955	63.7157	0.742575	1.14377	1.07443	5.20884	0	1.23071	0.286993	0	0.346769	0.493376	0.665785	0.465163	0.335873	0	0.347781	0.632869	0.389629	0.554994	0.661167	0.610847	10.2561	7.1522	15.2958	6.68656	0.579032	0.419751	2.92459	0.302514	0.411576
TCGA-AA-A00Q	3.50137	0	5.01237	1.09751	1.32232	1.71728	1.10663	0.907459	0.678458	0.767472	0.129519	1.18843	0.380539	0.330119	3.75494	2.49993	0.377814	0.565243	1.72041	79.7357	1.17444	0.584433	17.2042	8.9942	0.34366	0.174683	0.931812	0.335738	1.38798	0.980395	0.891732	1.28747	0.429055	0	0.789808	0.0898275	0.221211	1.01992	1.89773	0.52021	13.0195	2.77723	32.2478	0.343037	1.13417	0.714938	7.18585	0.83729	1.05152
TCGA-AA-3678	3.91781	0	4.38974	0.562639	0.813469	1.28549	2.26926	1.5507	0.0869533	0.429214	1.04577	0.761564	0.760829	0.101542	1.64998	4.2538	0.565358	0.43466	1.70705	85.2048	2.08413	4.79378	3.20882	6.21531	0.5946	0.134327	1.06894	0.0860585	0.567728	1.61551	0.58663	0.913877	0.109978	0	1.00591	0.483528	0.425266	0.87994	1.94041	0.80006	16.6701	1.55318	13.0708	1.84652	1.85806	0.824658	10.1198	0.693386	0.317097
TCGA-CM-4746	1.91507	0	6.56212	1.75939	1.33547	0.0730868	0	0.242455	0.0575801	0.0335542	0.436021	0	0.366021	0	0.773933	5.67884	0.108038	0.271839	0.960838	165.506	0.782056	5.43398	0	1.71097	0.247911	0.168019	0.220392	0	0.482883	0.404139	0.352009	0.0952574	0.481467	0	0.451057	0	0.319157	0.334978	0.681993	3.58594	8.29196	7.28529	11.3833	2.30965	0.379442	0.0982374	8.31994	0	0.13882
TCGA-A6-3810	0.676712	0	6.6207	0.490027	0.974168	0.732822	0.1647	0.270115	2.06702	0.841099	0.26023	0	0.407778	0	1.61667	1.63867	0.355618	0.189282	1.04072	131.031	3.63031	3.65322	0.323243	8.74152	0	0.70195	0.409226	0	0.672465	0.562806	0.455687	0.530623	0.383139	0.524045	0.661204	0.601608	1.18522	0.83302	0.810077	0.812942	9.50467	3.80457	0.319175	8.63839	0.792619	0.273612	6.31165	0.172543	0.441878
TCGA-AA-3819	2.08493	0	5.59071	0.465415	1.20912	1.51045	1.75981	1.28274	0.327906	0.582498	0.823867	0.157491	1.02876	0.472474	3.62542	0.888145	0.568341	0.561797	2.25048	72.0756	1.93949	1.23919	4.66908	7.62886	0.136626	0.902815	0.995971	0.177969	0.516587	2.44997	1.38938	1.10244	0.341152	0.466617	0.333622	1.64275	0.70356	0.771401	1.57526	0.896201	20.4637	2.55955	19.5149	2.29116	2.97987	0.933905	11.347	0.819384	0.37706
TCGA-AA-3554	1.49589	0	8.60104	1.0635	1.44152	0.299784	0.382978	0.261708	0.421256	0.724374	0.336175	0.411287	0.158035	0.137096	2.50617	1.87759	0.392258	0.733564	1.38285	21.9778	1.31314	2.62936	0.0104394	4.23617	0.356797	0.181361	0.253753	0.116191	2.42218	1.59952	0.535157	1.02822	0.222729	0.406188	0.25625	0	0.344501	1.47214	1.4723	0.540097	9.44767	4.32509	11.8749	0.641071	1.07513	0.371134	1.88698	0.133738	2.7186
TCGA-CM-6167	0.334247	0	0.929051	0.195287	1.16469	1.09518	0.787642	1.45324	7.0694	0.651773	0.51854	0.105733	0.406273	0	1.00222	2.75417	0.283445	1.96127	1.21463	36.1196	2.12192	1.03992	0.617262	7.822	0.137587	0.326368	0.70127	0.0597404	0.0630572	0.0747638	0.811705	0.634398	0.534415	0.313267	0.408434	0.095902	0.826595	0.424932	1.20228	0.647953	7.99953	6.90718	13.1863	8.46002	0.842339	0.463423	4.60846	0.653243	0.275154
TCGA-AZ-6603	2.46301	1	10.4337	0.299317	1.32777	1.47512	0.868833	1.53742	0.633267	0.518948	0.505761	0.589299	0.820826	0.0245541	1.04734	2.88806	0.99495	0.315319	1.87817	37.5889	2.48625	1.5939	4.55464	4.95744	0.702934	1.03943	1.03962	0.249721	0.373413	0.572954	1.23643	0.810286	0.664853	0	1.93677	1.36967	0.987213	0.610589	2.29567	1.32201	12.9696	4.65954	16.4237	1.1992	2.18233	0.569751	6.59651	0.455103	0.582754
TCGA-AG-A00C	0.50137	0	9.18631	0.784947	1.34768	1.43473	0.395736	0.432682	0.199805	0.0748505	0.833698	1.69995	0.816497	0.0708314	1.58257	3.25259	0.416279	0	2.7983	66.8619	6.68748	3.13494	1.89854	8.88578	0.460854	0.74961	1.03244	0.240123	0.126728	0.751274	1.11703	0.531235	0.613729	0	0.450137	0.192737	0.237318	0.533748	2.66235	0.651104	21.3637	2.57316	18.1501	0.441618	2.59221	0.821781	5.32595	1.10555	1.9465
TCGA-DM-A1D9	11.6986	0	7.76421	0.275838	3.5519	1.31296	0.927104	1.88477	0.323901	1.06309	0.895186	0.560044	0.334746	0.103712	1.3482	3.2084	0.343256	0.355159	2.70247	67.2933	4.22895	0.367217	5.0543	6.52453	0.323897	0.905508	0.748653	0.421909	0.157722	0.616012	1.40075	0.746726	1.39287	0.245823	2.45028	2.70918	0.660218	0.156304	3.00722	0.59925	22.1817	1.96314	20.5367	3.57797	1.44075	0.513391	3.41011	1.27477	0.0971622
TCGA-EI-6917	1.45479	0	5.90167	0.0267357	2.10185	1.36607	0.943528	1.16057	1.18852	0.548131	0.970203	0.21713	0.222482	0.0241255	0.588034	0.621951	0.462673	1.34253	2.94046	140.374	2.11273	1.49489	0.867105	6.29277	0.376726	0.287236	0.731216	0.163575	0.345313	0.665308	1.74035	1.33897	0.627118	0.0714794	0.117244	1.05035	0.0404159	0.709009	1.21162	0.665308	30.6353	5.65068	13.2637	1.10306	1.49556	0.802389	3.24683	0.894319	22.5115
TCGA-AA-3662	0.50411	0	3.82562	0.352697	3.79262	1.29665	1.00761	2.33298	0.416823	0.538116	1.15502	0.763832	0.623684	0.127305	0.775733	1.43583	1.03367	0.749296	1.17709	126.611	3.0484	0.845166	2.24899	4.82328	0.911123	0.799945	1.67888	0.863148	0.4413	1.41778	2.06727	1.86184	1.79247	0.377182	1.26114	1.51553	1.06633	0.299783	0.985158	5.14065	18.4634	3.286	17.1529	1.81894	0.879501	1.20621	4.55092	1.02455	0.24847
TCGA-AA-3941	2	0	6.94036	0.84461	4.64868	0.685769	0.516139	0.793585	0.425795	0.988443	0.815514	0.207859	0.958426	0.277146	3.9405	1.11637	0.332189	0.296587	1.68895	101.505	0.948061	0.204438	8.52594	5.05184	0.0901604	0.274973	0.577097	0	2.97512	1.17582	1.34149	0.935367	0.825472	0	0.310814	0.282799	0.928568	0.88758	4.44261	1.18282	12.8561	1.2254	34.7582	0.287991	0.724477	1.01822	6.97581	0.473128	0.389465
TCGA-AA-3715	1.5863	1	7.05004	0.70091	0.452403	0.270367	1.00962	0	0.355006	0.190963	0.708992	0	0.520773	0.0903544	0.917622	1.6742	0.293457	2.7074	2.43035	25.6479	0.247268	3.46582	0	1.71926	0	0	0.125429	0.153154	0.606214	0.958345	0.86059	0.271063	0.293584	0	0.540431	0.12293	0	0.476604	0.627864	0.593261	13.6433	15.2027	1.73917	0.28167	1.55212	0.349429	2.14181	0.0881417	0.366809
TCGA-A6-5666	0.991781	0	6.13289	0.21974	4.26912	0.243418	0.123092	0.630864	0.149822	0.733383	0.259319	0.396573	0.457143	0.29743	0.805504	1.17145	0.822893	0.707321	1.05559	96.5557	0.723519	0	4.29313	4.14027	0.0430041	0.349745	0.435827	0.0560171	1.43384	0.0701043	0.678555	0.148715	0	0	0.494166	0.674438	2.43596	1.12064	1.17954	0.520775	15.8599	2.52749	16.7377	0.171705	1.94992	0.460102	5.22256	0.580292	1.17651
TCGA-AA-3971	1.33973	0	15.1253	0.0823667	1.2653	1.43707	1.24577	1.07831	0.359418	0.314171	0.583215	0	0.599741	0.297301	4.529	2.93401	0.195417	1.27263	1.12455	42.2196	2.94932	1.75444	5.90867	4.51812	0.580304	0.88491	0.859814	0.503936	0.56516	0.945998	0.783354	0.445952	0.241501	0.440424	1.44481	0.303366	1.49415	2.15629	2.39459	0	14.6991	3.33959	24.9467	1.62191	1.94291	0.862318	7.36946	0.29002	0.348157
TCGA-CM-5863	0.832877	0	3.04376	0.158367	0.429316	0.322356	0.585505	0.763837	1.0625	0.634261	0.392472	0.342973	0.329464	0.0571622	0.290264	2.60188	0.106088	0.428205	0.768775	73.547	1.05592	0.505992	0	5.82342	0.0743835	0.0756187	0.330634	0.290676	0.792605	0.363775	0.611388	0.128615	0.711981	0.0846804	0.320532	0.427741	0.19152	0.581505	1.36317	0.337791	5.46144	10.9158	10.5214	2.96995	0.234812	0.331597	2.38948	0.195168	0.276687
TCGA-D5-6535	1.26027	0	2.90467	0.363431	1.24795	1.19268	0.793978	0.851411	0.30396	0.710444	0.70767	0.295154	0.340234	0.163975	0.532894	3.11758	0.410835	0.280764	1.84693	27.4976	1.0321	3.09649	2.86682	5.05843	0.213375	0.390453	1.21402	0.833828	0.542743	0.834815	1.10606	0.639501	0.213117	0.19433	0.576202	0.535422	0.219757	0.556032	1.78167	0.301461	12.3204	6.34877	27.2225	0.443017	1.05323	0.659507	3.88695	0.767803	4.33206
TCGA-5M-AAT4	0.134247	1	1.94356	0.478755	4.06661	1.39216	1.18002	1.53943	0.136373	0.913057	0.847482	1.29604	0.431598	0.432015	1.63799	2.45947	0.583518	0.431499	4.13975	110.451	3.19213	0.0849807	2.18872	5.1941	0.449735	0.228601	1.27274	0.244093	1.4557	2.68821	1.42106	1.29604	0.499101	0.341328	1.29199	2.11597	0	0.629384	3.67521	0.264748	33.0097	6.25016	29.7628	0.209496	3.18359	0.601465	4.98456	1.20811	2.24851
TCGA-D5-6532	1.52055	0	13.7052	0.319384	2.74175	0.729713	0.590404	0.704209	0.127753	0.319784	0.480561	0.259382	0.79733	0.172922	0.468309	2.67008	1.39068	0.801892	2.42252	44.5527	2.0112	0.765338	10.0731	6.38657	0.112509	0.53376	0.56678	0.0977028	0.0773455	0.305683	0.868506	0.216152	0.842797	0	0.915772	0.0392109	1.30358	1.41163	1.59305	0.719082	9.84792	2.03886	17.6477	0.958337	1.95879	0.423537	6.795	0.449831	0.414003
TCGA-AA-A00K	1.50411	0	5.44725	0.470555	3.04733	0.733024	0.922573	0.324227	0.313703	0.598279	0.555311	1.06154	0.489468	0	3.44985	2.2235	0.251738	0.454402	1.13023	47.3934	4.26074	2.08813	7.15641	6.79255	0.460449	0.468095	0.442085	0.119956	1.39278	1.20098	1.38125	0.636923	0.229946	0.419351	0.476198	0.192568	0.47422	0.39996	1.83295	1.85866	16.7923	5.91984	19.2409	0.588307	1.69138	1.04001	4.20291	0.759397	4.04429
TCGA-AA-A00Z	1.83288	0	6.48725	1.13636	2.63129	1.91771	1.3129	0.685111	0.180784	0.237037	1.19436	1.53812	0.517138	0	5.33713	1.29077	0.921803	1.50885	1.02354	65.557	6.22623	0.3782	7.14452	12.1623	0.583774	0.169562	0.815529	0.108632	0.573317	2.44711	1.69115	0.576795	0.416478	0	0.958318	0.61036	0.536815	1.03831	3.01619	5.30208	25.8996	5.05465	6.01377	2.13108	3.39849	0.19828	6.48514	0.250076	5.16352
TCGA-AA-A01P	3.1726	1	1.89652	0.465092	2.10136	0.676212	0.669939	0.320463	0.604015	0.538535	0.294034	0.539595	0.483785	0	2.19201	1.11092	0.185452	0.513287	0.806336	31.4694	2.21502	10.2605	0.821771	5.17913	0.0780177	0.158626	0.457759	0.101626	0.375439	0.635914	1.0204	0.269798	0.129872	0	0.201715	0.0815707	0	1.10688	0.908992	0.629857	11.2963	9.62926	16.8777	1.37062	1.02992	0.370984	2.5215	0.584868	0.674024
TCGA-AA-3530	1.58904	0	3.40984	0.477834	0.647679	2.72933	2.54286	1.37184	0.333036	0.721446	0.845852	1.50914	0.66272	0.503048	8.32014	1.04211	0.544607	0.307621	0.664468	58.8775	4.12998	1.90839	3.94	14.0615	0.467572	0.760538	1.57955	0.365436	0.578588	0.762226	1.28479	1.07796	0.544842	0.212919	0.940264	3.71538	0.601945	0.731064	1.54352	0.188742	25.7495	2.61067	16.8585	5.00329	2.63	2.55687	5.64172	0.841248	0.763023
TCGA-AA-3524	3.00274	0	5.95417	0.36811	3.65899	0.420519	0	0	0.334645	1.05306	0.162905	0	0	0.332171	1.01204	0.936611	0.53942	0.710946	0.837633	113.562	1.81807	1.96022	8.27109	2.68483	0	0	0.268985	0.563042	1.63433	0.352318	0.401958	0	0	0	0.620873	0.45193	0.278232	0.438037	1.36395	0.436203	15.9793	1.74656	15.7845	1.20809	1.24045	0.128461	6.05366	0.324037	0.777984
TCGA-AG-3742	0.0821918	0	10.7335	0.108471	3.03854	1.31424	1.21525	2.2671	0.548928	0.60337	0.480031	1.07669	1.54202	0.0978809	0.331353	2.05022	0.994073	0.558651	2.22142	113.15	2.23221	0.770157	9.90796	8.6311	0.679304	0.388453	0.913397	0.221215	0.145936	0.830539	0.718312	0.734106	0.0353376	0.0966675	2.06127	0.31073	0.819867	1.2293	2.13324	0.685524	22.8018	3.21271	19.6647	1.15272	1.41336	0.100943	8.36612	0.700214	0.764161
TCGA-AA-3821	0.0849315	0	8.03707	0.248441	2.09533	1.80608	2.22672	1.31241	0.617339	1.14505	1.39265	0.224186	0.77528	0.373644	9.41073	2.04689	0.416069	0.639767	1.94724	34.518	2.65857	2.86645	0.261757	10.8596	0.583453	1.18628	0.708874	0.506671	1.63783	0.951133	2.31614	2.80233	0.485624	0.664221	0.419034	0.915037	0	0.985453	1.60505	0.294398	28.445	3.17911	13.2153	0.698876	2.73484	1.5028	3.58092	2.04116	0.910121
TCGA-AA-3489	0.586301	1	3.32517	0.139791	2.29901	1.3182	0.65778	1.46407	1.71307	0.519874	1.13829	0.37843	0.581638	0.0252287	0.768652	2.49993	0.663314	0.539969	2.39631	71.388	1.31179	4.54085	7.42692	5.30179	0.722245	0.800987	1.11487	0.213817	0.146698	0.267588	0.848904	1.28666	0.136623	0.149495	0.518713	1.33865	0.380375	0.408736	0.764995	0.29817	18.1756	6.36731	12.2616	3.43428	1.82774	0.936645	4.78428	0.812157	0.583006
TCGA-G4-6311	3.28493	0	4.89324	0.196291	1.84469	1.17419	0.593766	0.865602	0.456822	0.879735	0.660192	0.106276	0.326688	0.106276	0.143909	2.6827	0.706774	0.379105	1.01243	34.2895	4.84733	0.522634	0.803866	6.44247	0.23049	0.562362	0.508164	0.180142	0.792265	0.37574	1.08968	0.584519	0.115106	0.209918	0.860793	0.289184	0.830842	0.640673	1.477	0.0465202	9.64335	5.31707	25.1017	4.4542	1.56104	0.383603	6.04977	0.587483	0.663763
TCGA-AG-3726	0.665753	0	8.8947	1.1772	0.0625739	0.302042	1.28008	0.14314	0.031476	0.0330162	0.30645	0	0.360152	0.18746	2.79225	4.02723	0.0483207	0.13374	1.99591	12.0247	0	0.184374	6.31885	0.589235	0.081312	0.578636	0.318059	0.105917	0.531039	3.97659	0.370756	0	0	0	1.0278	0	0.418719	0.588583	2.26975	2.13347	4.23457	5.1374	8.11865	0.389591	0.606706	0	5.27187	0.0609564	0.50735
TCGA-AD-5900	1.0137	0	5.25926	0.302877	0.855279	0.267363	0.381743	0.495643	0.884539	0.523479	0.234564	0.717433	0.27567	0.10249	0.277566	1.37614	0.232483	1.02368	1.23481	65.1531	4.86164	4.83856	0.218521	6.46034	0.0444559	0.0903882	0.0632338	0	0.336179	0.362355	0.92017	0.461207	0.111005	0.20244	0.574705	0.185922	0.114464	1.02975	1.1762	0.986986	17.4519	8.98157	10.357	1.38451	0.688928	0.237817	2.81264	0.199961	0.810817
TCGA-G4-6293	8.9726	0	2.81697	0.265699	3.22412	0.882991	0.5103	0.679992	0.127674	1.06775	0.671906	0.513769	0.947582	0.0685026	0.904409	1.40727	0.513836	0.659772	2.50476	49.0945	2.29647	5.86162	1.04325	4.6371	0.757693	0.589034	1.48189	0.116114	1.85374	0.290629	0.772791	1.07892	0.408066	0.10148	0.53777	0.3262	0	0.838824	1.02777	0.584718	9.89258	5.56652	9.47715	0.67624	0.89535	0.556334	4.17306	0.434362	0.438539
TCGA-AG-4022	3.83562	0	7.8494	0.159262	1.87088	0.998997	0.802927	1.29489	1.62157	0.880833	0.648419	0.431139	0.728916	0.0574852	1.05086	2.47765	0.684578	0.799731	1.28048	89.1778	0.943899	3.47715	7.24448	4.89318	0.224412	0.798483	1.23026	0.779516	0.694234	0.365831	0.596891	1.20719	0.280175	0.0851589	0.741389	0.273737	1.01116	0.519814	2.31505	0.264211	10.7706	2.48675	13.9695	2.38939	1.22363	0.578015	6.01477	0.504697	0.242347
TCGA-A6-2674	1.43288	0	2.39118	4.18856	1.98708	6.48138	0.351948	25.6137	7.22527	11.4331	2.68776	4.53556	1.19815	48.1904	160.066	0	4.36955	0.808955	0.0794255	46.8783	2.97376	0	0.316589	49.3089	10.8203	6.25	11.0184	31.3924	0	0	3.49668	16.1579	17.1933	32.1952	0.141293	7.19924	0.791472	3.48896	0.268612	0.248168	32.7206	0.993666	6.13842	6.57862	8.75104	12.2052	1.5655	13.0891	1.00327
TCGA-A6-2681	1.51233	0	6.94404	0.304092	0.604532	0.202116	0.30662	0.419058	0.663474	0.0869924	0.269149	0.164642	0.126526	0	0.780303	3.18333	0.263122	0.234923	0.876485	31.1218	0.450567	1.13353	4.39632	2.36578	0	0	0.126975	0	0.147285	0.582094	0.342766	0.164642	0.356642	0	0.861669	1.64268	0.275815	0.868461	0.936068	1.00896	3.52009	11.2277	14.657	1.25462	0.245935	0.127345	4.39238	0.107074	0.925468
TCGA-AA-A010	2.91507	0	1.4507	0.435628	1.57459	1.71916	1.8302	0.450242	0.178211	0.311553	0.385569	2.35859	0	0	2.39534	0.316687	0.48637	1.26202	1.81733	71.9393	3.49625	10.4389	0.538798	7.47985	0	0	0.773067	0.999472	0.263741	1.25082	2.01015	0.294823	0.212878	0	0.146951	0.267411	0	0.370272	1.73829	0	26.7519	3.28826	8.27583	0.40848	1.76157	0.304047	3.20627	0.766942	4.051
TCGA-A6-6780	0.969863	0	2.49409	6.55326	1.97391	3.1155	1.83548	8.37857	1.67472	5.24223	3.67347	2.75962	1.13611	8.8045	56.9865	1.05867	3.63796	0.562515	0.441835	42.0278	2.06783	7.75483	0.220143	23.157	10.602	4.95444	5.56389	6.23687	0.235112	0	2.05699	6.50481	4.69683	5.25614	0.0982495	0	0.220143	0.717923	0.311304	0	18.1494	0.690956	1.26472	3.07243	4.07311	5.4378	1.0216	11.2809	0.492446
TCGA-CM-5864	0.167123	0	1.69001	0.327197	5.2375	0.660186	0.471309	1.15945	0.212465	0.534868	0.165485	0.253074	0.243106	0.042179	0.856723	1.35921	0.456636	0.451378	0.77999	147.302	3.232	2.86244	8.65902	4.51717	0.329317	0.892762	0.712388	0	0.301857	0.715795	0.793598	0.759222	0.319783	0	0.662241	1.26249	1.76649	0.33373	1.25232	7.53289	14.2516	2.27826	15.5778	2.76126	1.00808	0.554606	4.77341	0.781774	0.30295
TCGA-AA-3869	2.25205	1	3.26507	0.329962	2.26605	0.795003	0.443607	0.727534	0.359959	0.566358	0.116818	0.178649	0.0686449	0.0595497	1.33051	2.54264	0.174988	0.127454	1.25138	43.5728	2.44449	1.75708	2.84768	4.49232	0.15498	0.157554	0.247999	0.100939	0.266358	0.757937	0.395172	0.178649	0.193492	0	0.422964	0.0810192	0.399039	0.246804	2.10664	0.469199	11.6633	1.22398	24.8589	2.53708	0.667143	0.322416	3.68838	0.87137	0.390522
TCGA-G4-6314	2.99452	0	7.55543	0.123113	2.00248	0.85024	1.08619	1.14519	1.75996	0.719059	0.381381	0.333281	0.416199	0.0833202	2.53855	2.23747	0.562699	0.594434	1.54079	43.0232	3.00223	1.14728	7.07209	8.71743	0.180703	0.624594	0.314864	0.141231	0.236031	0.530242	1.08848	0.958182	0.962587	0.411436	1.09016	2.41834	0	0.544143	0.684253	0.0729433	17.4641	5.50941	8.15252	2.5397	1.90838	0.988158	5.07572	0.866983	1.59586
TCGA-CM-6168	0.49589	0	3.91448	0.155838	2.95723	0.563209	0.680913	0.644265	1.98056	0.906481	0.524137	0.0843744	0.226943	0.0562496	0.342756	2.08452	0.513272	0.66215	1.46572	40.304	0.230903	0.912841	2.47143	3.90712	0.475774	0	0.579131	0.19069	0.742211	0.596612	0.944159	0.970306	0.21323	0	0.841105	0.0765294	0	0.773558	0.710678	0.0369331	9.34184	5.35058	9.03387	2.22113	0.840229	0.261042	2.16494	0.329232	0.202006
TCGA-QG-A5Z2	2.60822	0	3.21769	0.290625	2.07707	1.71763	1.332	1.27431	0.124896	0.592055	1.21599	0.643707	0.659576	0.166887	1.40432	1.92067	0.416657	1.27567	2.64526	40.0943	3.65368	5.76835	1.00937	7.21818	0.837637	0.378465	1.83682	0.565759	0.479869	0.859758	1.88176	1.3947	0.361505	0.282546	0.329759	1.10284	0.519211	0.431168	3.43386	0.594846	21.0216	4.98005	16.1475	0.668896	1.54914	1.49365	3.59746	1.23263	1.06465
TCGA-AA-A02Y	3.33151	0	5.36581	0.223346	2.04345	0.295737	0.0469172	0.211602	0.00507605	0.585687	0.172971	0	0.377525	0	0.409363	1.4004	0.22988	0.485278	1.20703	97.7084	1.10309	3.64236	0	2.98224	0.0655649	0.433248	0.244805	0.0854048	1.32966	0.374088	0.446464	0.264523	0.218285	0.074641	0.52739	0.137101	0.337628	0.19933	2.02116	1.7203	7.61767	1.25238	19.4876	0.157071	0.432762	0.253312	2.92811	0.368635	0.448431
TCGA-D5-6529	1.68219	0	1.7983	0.0914526	2.25881	0.493873	0.512293	0.672146	0.864643	1.01741	0.4317	0.412621	0.317094	0.0550161	0.726353	1.83936	0.242499	0.412128	1.20236	64.2435	1.24211	1.62331	14.1976	5.66963	0.608522	0.254729	0.521881	0	1.10736	0.466823	0.893389	0.742717	0.208554	0	1.00776	0.898214	0.0921648	0.393844	0.886244	1.30044	8.31255	7.56059	14.7925	1.54356	1.00671	0.170212	4.21389	0.295178	0.128854
TCGA-AZ-6599	0.564384	1	2.35647	0.182107	1.25064	1.53568	0.856898	1.1293	0.0860871	0.416767	0.451307	0.492985	0.985019	0.0328657	0.400533	4.68646	0.127075	0.773766	1.38128	28.1558	0.764503	1.16369	0.0100105	7.67042	0.256603	0.47825	0.463842	0.334251	0.147004	0.209154	0.697909	0.492985	0.498347	0	0.110575	0.849581	0	0.136212	2.39799	0.992652	10.6091	6.59811	13.7197	6.18146	0.760943	0.559248	2.86496	0.833581	0.0307901
TCGA-NH-A8F7	1.48767	0	1.7645	0.388846	2.45961	2.63418	1.05559	1.54573	0.10333	0.342271	0.555956	0.566811	0.777836	0.215928	1.15128	2.21793	1.18553	0.693226	2.54102	38.7051	1.99435	0	5.14643	4.59498	0.386349	1.46394	1.4363	0.549009	1.15898	0.687073	0.88924	1.05265	0.263101	0.559785	0.645758	1.28527	0.271298	0.803391	3.90461	0.141777	12.1288	2.32231	36.6595	0.19633	3.16495	0.54279	7.01728	0.84256	0.876597
TCGA-CM-6161	0.580822	0	0.941106	0.0638134	2.76786	0.947685	0.536198	1.12122	0.353874	2.61658	0.649526	0.086375	0.431458	0	1.28657	1.25253	0.659029	0.739473	0.943847	86.3664	2.56075	6.7113	0.0613872	4.75608	0.561986	0.761757	0.806027	0.0488029	0.334831	0.183227	2.00277	0.691	0.997879	0.0853042	0.236788	0.156688	0.0482328	0.661724	0.372858	3.32718	16.9117	2.09189	6.3732	2.93199	1.39775	0.200424	3.84545	0.449385	0.152849
TCGA-AA-3950	2	0	6.19806	0.0857131	1.1618	0.053409	0.144043	0.472472	0.92726	0.490403	0.151727	0	0.0891581	0	0.471301	0.311553	0.131583	0.331083	2.34048	27.6664	1.48166	2.05394	7.51511	7.21532	0.100647	0	0.178949	0	0.0691907	0.328144	0.326072	0.116018	0.251313	0	0.231309	0.736612	0.129571	1.71935	0.390882	0.203137	10.7487	5.17593	12.8406	0.723344	3.58156	0.17947	1.97143	0.452705	4.32347
TCGA-AA-3975	2.83836	0	14.9154	0.945298	0.640651	1.718	2.2505	1.46551	0.222002	0.6385	0.557782	0.426505	1.393	0.142168	7.07478	5.3258	1.07739	0.152141	1.61327	52.0353	2.33438	1.67794	4.72	5.51807	0.0924997	1.59861	1.06901	0.12049	0.381539	1.50791	0.338524	0.853009	0.0769899	0.842435	1.06293	0.870409	3.33431	0.830261	2.2228	2.24032	20.4358	1.42708	13.8535	1.18185	2.38909	0.934676	8.40698	0.62409	0.355173
TCGA-AG-A036	9.7589	0	9.85541	1.24609	1.26675	1.63379	0.916156	1.39521	0.708003	0.334191	0.413586	0.421662	0.648085	0.070277	6.56622	1.81172	1.1195	0.601655	2.00845	44.6151	3.17333	2.48833	8.01636	8.3547	0.457247	1.20858	1.43085	0.357366	0.660112	1.49079	1.63499	1.26499	1.4462	0	0.814414	0.382456	0.235461	0.794355	1.42065	1.10744	30.7215	2.31787	24.9407	1.67962	1.57464	0.760992	12.5568	1.78245	1.31678
TCGA-A6-6141	0.69863	0	0.569586	0.0427598	2.27971	0.75492	1.14974	0.353554	0.478132	0.53007	0.264924	0.347267	0.533741	0	0.0783728	3.76128	0.226767	0.991007	2.3352	39.8271	2.21747	5.57866	0.141031	6.00353	0.0502098	0.204174	0.3928	0	0.414207	0.327404	0.867562	0.694534	0.501491	0	0.923148	1.20742	0.0646392	0.261682	0.938437	0.456026	9.27343	7.96769	11.1869	5.53312	0.893368	0.537196	3.65859	0.790446	1.15675
TCGA-AA-A00F	2.83562	0	7.99493	1.05034	2.61008	2.32704	1.47093	0.663406	1.87788	0.333859	0.464822	1.65864	0.819416	0.552881	3.20854	4.26321	0.842865	0.676188	1.85892	32.6959	2.37763	1.63134	4.11379	6.33073	0.411113	0.417939	0.383752	0.535516	0.847872	0	0.894105	0.710847	0.68436	0	0.679097	0.322376	1.58778	0.416622	1.5218	0	20.7616	2.90705	33.8264	1.5594	1.8287	0.855265	5.13361	0.924584	0.912604
TCGA-A6-2675	2.31781	0	4.38261	0.121214	0.839753	0.797265	0.611109	0.863044	0.852173	0.462347	0.643713	0.328141	0.252173	0.0364601	0.888676	3.49538	0.242472	0.624284	2.20658	24.8365	0.698447	0.645479	6.34113	2.50491	0.237222	0.385858	0.632669	0.370807	0.472935	0.386714	0.130937	0.710972	0.157957	0.540122	0.940454	0.892892	0.244317	1.45614	1.7044	0.478789	9.4726	6.79689	18.2467	2.23532	0.571854	0.197404	9.63709	0.426806	0.40989
TCGA-CM-4751	1.66301	0	4.40269	0.482005	2.55525	0.981124	1.29603	0.642091	0.8939	0.597515	0.824793	0.434947	0.501378	0	2.82703	3.01345	0.327374	0.806794	2.07173	33.1461	1.46803	5.13345	0.0485759	5.29283	0.641448	0.421947	0.952645	0.24575	3.78716	1.10719	0.987004	1.04387	0.533894	0.0859111	0.498625	0.0394506	0.145728	0.360528	1.9783	0.0761556	16.5837	4.58777	15.3138	2.3201	0.909583	0.717686	3.20763	0.763732	0.488975
TCGA-AZ-6607	0.265753	1	3.18115	0.199012	7.44512	0.165343	0.0668888	0.466227	1.24111	2.03057	0	0.10775	0.331218	0	0.437715	2.54629	0.0388838	0.999339	1.05666	66.384	0.688036	1.8016	0.0546988	3.97351	0	0	0.124648	0.12176	1.68683	0.53333	0.358916	0.161625	0.427907	0	0.456504	0	0	1.36678	0.680675	0.0471652	6.70545	16.5158	6.00597	2.27664	0.348728	0.138901	2.01404	0.280296	0.426212
TCGA-AA-3560	1.66575	0	15.2903	0.547848	1.73268	0.227581	0.30689	0.188742	0.348631	0.087069	0.484894	0.494362	0.189956	0	1.00413	1.32756	0.152915	0.352694	0.692571	74.9055	0.225482	2.43112	5.97288	1.30417	0.214433	0.435987	0.114378	0.13966	0.405389	0.174782	0.379519	0.247181	0.713913	0	0.646821	0.672595	0.138029	0.558788	2.02993	0.324595	15.3038	1.45721	28.3487	0.77056	0.430765	0.0637285	10.6056	0.160752	1.08066
TCGA-AA-3663	0.580822	0	16.9942	0.357219	1.57811	0.181368	0.266806	0.519618	0.140723	0.624497	0.386431	0.107448	0.165145	0.071632	0.290992	0.836766	0.0997069	0.613255	2.04718	90.5729	0.833132	2.11359	0.0109091	3.4618	0.139819	0	0.24031	0.0607094	0.0801	0.835742	0.5117	0.53724	0.349125	0.106116	0.455225	0	0	1.79477	2.80558	0.0940662	32.4761	4.41697	11.0304	0.260522	1.41775	0.36013	1.65236	0.698777	0.961884
TCGA-CM-5862	0.419178	1	10.3854	0.174642	3.31405	0.380877	0.293489	1.92534	0.658877	0.478786	0.193217	0.354582	0.726646	0.078796	0.320095	1.8409	1.15772	0.421617	0.695446	182.122	3.28845	0.116248	0.546007	3.9208	0.102535	0.469069	0.765686	0.267124	0.0881109	0.83575	0.636695	0.472776	1.66418	0	1.13406	3.21613	1.18802	0.192973	0.62221	1.03474	15.681	1.67607	9.90588	2.5792	0.559082	0.21331	5.27209	0.691796	0.873533
TCGA-4N-A93T	0.4	0	12.5642	0.440167	2.08053	4.32509	1.08111	1.07317	0.070796	0.581167	0.749205	2.2915	0.633957	0.09166	2.73059	9.20576	0.448909	0.523146	4.31458	37.4163	5.47669	0.72121	0.246614	10.5212	0.357824	2.06134	0.812932	0.569679	0.532978	1.55551	0.553393	0.82494	0.794202	0	0.673878	0.124706	0.25592	0.299304	3.44525	0.240733	26.1878	7.7988	25.4353	3.84162	2.48733	0.921643	7.79547	2.41421	1.40257
TCGA-AG-3608	1.32877	0	16.1863	0.640614	2.83007	0.768782	0.478473	0.245224	0.297659	0.441186	0.189	0.963452	0.370201	0	2.08739	2.5355	0.238411	1.23724	1.34974	76.2349	0.527325	2.27422	6.23105	3.55835	0.167162	0.849687	0.371515	0.108872	0.603315	1.77127	0.68197	0.770762	0	0.190302	0.360164	0.174774	1.61401	1.37941	2.92143	0.927808	16.4668	3.1316	21.7129	0.734179	1.5351	0.347757	10.6087	0.375943	0.401159
TCGA-G4-6315	3.06027	0	6.84426	0.239778	2.92506	1.00436	0.671587	0.991289	0.0290641	0.514455	0.530563	0	0.332554	0.180308	1.02546	1.77216	0.540993	0.30873	1.06092	64.9919	1.13491	0.85123	10.6214	9.06603	0.140777	0.09541	0.250301	0.244502	0.548414	0.30599	0.717912	0.48683	0.351518	0	0.727961	0.34344	0.724938	0.978266	1.16182	0.284133	10.677	1.99954	19.9127	1.72374	1.45441	0.474168	6.91212	0.738746	0.810819
TCGA-CM-6679	0.334247	0	7.7518	0.266635	1.28501	1.80297	1.04553	1.85761	1.55402	0.536763	0.786652	0.64161	0.523887	0.106935	0.380104	3.72593	0.657404	0.686618	2.22467	54.2655	2.88985	2.05091	10.0156	6.62645	0.0695757	2.08656	0.705119	0.226573	0.227195	0.396972	1.09156	0.922314	0.231639	0.158414	1.05934	0.945675	2.46319	1.18856	1.15684	0.0702128	10.2934	6.32547	22.6737	2.83354	1.37771	0.641004	10.1667	0.54766	0.0751363
TCGA-AA-3846	1.41918	0	4.37593	0.82935	4.15591	1.4877	1.01363	1.09095	0.51406	0.431371	0.867512	1.42873	0.784258	0.204104	8.29136	2.90493	0.799686	0.728073	1.08656	82.0336	2.60661	3.6134	5.00449	9.0161	0.0885315	3.51006	1.35371	0.576606	0.973791	0.72161	0.451478	3.06156	0.294748	1.00787	0.737563	0.83307	1.25371	1.05098	2.81511	0.536053	25.0008	2.11384	15.7146	2.2623	2.48986	0.947201	4.69947	2.522	0.382428
TCGA-AY-6197	1.1589	0	9.62115	0.334026	2.49701	0.384736	0.86752	0.836924	0.118703	0.550168	1.93511	0.411021	0.284278	0.0822041	1.11313	2.78145	0.873002	0.527824	3.06333	45.3899	1.12482	2.18298	0.00417306	3.78817	1.53323	0.761222	1.84486	0.232232	1.00501	1.10441	1.51244	0.616531	0.0890338	0.48711	0.594115	0.149122	0.0459037	0.743336	3.06386	1.04351	20.4052	4.42708	12.6254	0.284736	2.25119	0.445073	2.66101	0.641528	4.25281
TCGA-F4-6463	1.13699	0	0.312968	0.0730958	3.36863	0.569338	0.859873	1.3095	1.75762	1.37662	0.485222	0.692575	0.304135	0.0659595	0.535898	1.32845	0.188723	0.988212	0.693039	58.2992	1.8502	0.681175	9.2818	13.6836	0.429156	0.0436282	0.495974	0.167706	0.398288	0.48972	1.24618	0.346288	1.57167	0.0977128	0.542464	1.92941	0.220995	0.571592	0.625017	0.0433086	10.0919	8.93837	8.60955	7.19676	1.0099	0.56119	3.90045	0.868647	0.463455
TCGA-A6-2685	1.27123	0	4.63558	0.744335	1.10063	0.702736	0.454862	0.0932491	1.72243	0.516203	0.359347	0	0.563093	0.122121	2.72853	2.45958	0.0661051	1.30688	2.10434	33.3184	0.250652	2.34216	2.2225	1.65539	0	0	0.536837	0.724499	0.682789	0.777168	0.309857	0.0915909	0.198401	0.723644	0.251087	0.415374	0.306872	1.70244	1.33077	0.40092	5.43176	5.45796	26.4446	1.1421	0.68407	0.0472281	4.17105	0.357391	0.133477
TCGA-AA-3860	2.58904	0	3.83399	0.512851	1.39028	0.441303	0.369367	0.403851	0.50619	0.733562	0.129691	1.58668	0.228627	0.462782	1.20855	2.34347	0.378317	0.848992	1.11142	146.179	1.62831	1.75563	1.913	4.84262	0.172058	0.612204	0.489469	0.672369	0.266138	1.82316	0.877433	0.495837	0.0716043	0.195876	0.667287	0	0	0.722364	0.542931	0.86817	9.52837	4.10818	9.54404	2.74795	1.82695	0.357944	9.85787	0.709418	0.433555
TCGA-AG-4021	0.331507	1	7.06627	0.216838	2.08188	0.7375	0.31885	1.17659	0.850102	0.930468	0.431821	0.366877	0.733047	0.0733755	0.248396	3.42853	0.20805	0.628182	2.8988	22.478	3.07897	0.288671	1.94439	5.61357	0.509234	0.355912	0.367824	0.165832	0.634517	1.45275	1.57724	0.733755	0.741735	0.144932	1.18862	0.199659	0.122921	0.340967	1.62234	0.610253	11.8826	3.77624	19.1551	2.36365	1.00471	0.41619	2.58718	0.620347	44.0328
TCGA-A6-2682	1.16164	1	17.0986	1.82515	5.96271	0.612379	2.35938	0.193474	1.03382	0.535512	0	0	0.146039	0	4.8892	2.75571	0.411467	0.542306	0.638942	45.4384	1.56016	2.24287	4.97786	3.2213	0.164857	0.167595	0.0879344	0	0.736663	1.61248	0.405519	0.380068	0.137215	0.375356	0.899838	0	0	0.954664	1.52061	1.33093	10.9555	6.47965	9.14459	2.10635	2.17629	0.195979	5.06978	0.74152	1.62208
TCGA-AA-3522	3.08767	0	5.07515	0.438412	2.443	0.531184	0.245587	0.352426	0.245776	0.313543	0.258689	0	0.0760055	0	0.937472	2.44345	0.0815796	0.705603	0.720492	96.4056	0.360881	5.64192	0.833445	4.30786	0.0857993	0	0.442396	0	1.68103	0	0.33974	0.692318	0.142826	0.195353	0.468317	0.80736	0.33137	0.422324	1.04131	0.606095	11.5168	4.06568	18.1645	5.27566	0.147736	0.203993	2.97467	0.192961	0.535349
TCGA-EI-6506	1.71233	0	4.71267	0.246283	0.766559	1.17086	1.7935	0.641077	0.0895576	0.300086	1.01725	0.444478	0.284647	0.172853	0.300936	1.43232	1.07697	0.317105	1.41142	56.383	3.04094	2.55011	4.93019	4.32855	0.610519	0	1.19976	0.20928	0.563292	0.942872	1.93745	1.00008	0.240703	0.146323	0.415395	0.100788	0.372302	0.502403	0.428977	1.91318	19.1003	3.37576	15.4771	1.15468	1.19878	0.381986	4.25475	0.867186	0.316161
TCGA-DM-A1DA	0.624658	1	13.6791	0.299518	4.08062	0.813532	0.271032	1.09539	0.0858757	0.351523	0.469023	1.18506	0.40742	0.145533	1.26686	3.60107	0.826368	0.489476	1.01359	90.6635	5.94564	0.797482	0.335624	6.89324	0.13527	0.467556	0.625324	0.105722	1.3298	0.573337	1.36829	0.467786	1.28351	0	0.862696	0.622294	0	0.66583	2.06199	4.36828	25.7773	7.17513	28.3129	1.16662	4.81365	1.06132	3.28023	1.68335	2.44118
TCGA-CA-5256	0.178082	0	17.3716	0.588957	3.548	0.217474	0.109973	0.49599	0.428333	0.468012	0.17376	0.531458	0	0.0590509	1.07948	1.14174	0.16439	0.126387	0.694904	181.948	2.18161	5.74981	1.10615	3.21176	0.0768412	0.156234	0.218597	0	0.369777	0.25053	0.244337	0.354305	1.34309	0	0.772618	0	0.98924	0.489474	1.90248	2.48143	14.6542	2.45569	20.0331	2.45446	1.76415	0.182695	6.0958	0.11521	0.516335
TCGA-AY-4070	1.3589	1	10.0965	0.58145	3.61224	1.37376	1.34357	0.751195	0.548414	0.69307	0.707624	0.393513	0.680423	1.50847	4.5293	10.4089	0.618748	0.421118	2.59105	60.149	2.06407	1.93518	0.0399531	6.2177	0.597411	1.99552	0.197265	0.444679	1.64279	2.50428	0.327699	0.393513	0.426207	0	6.37458	0.178462	0.219742	1.11199	0.973642	1.11964	30.3858	1.75559	1.49911	2.72608	2.05734	0.608735	7.03784	0.895711	0.675879
TCGA-AA-3994	2.25205	0	2.43563	0.213322	1.79913	0.42831	0.119497	0.244975	0.808036	0.372933	0.314681	0	0.369826	0	0	2.84309	0.069466	0.54933	1.88772	75.3987	0.52679	1.89326	0.195439	3.04692	0	0.169765	0.0148456	0.108762	1.14801	0.952794	0.310583	0.192495	1.59841	0.380218	0.28784	0.872986	0	0.797798	2.49286	0.421304	12.261	5.73546	13.9717	0.666759	0.335463	0.297776	3.74527	0.125187	0.601128
TCGA-AA-3664	4.50137	0	2.23204	0.558545	3.12926	1.43855	2.06502	1.8473	0.162486	1.06523	1.0876	2.11686	1.04579	1.20964	8.59937	2.43626	0.639194	0	1.86409	52.5876	3.86206	2.08202	4.82043	10.4221	0.524687	0.5334	1.58591	0	0.315614	4.4905	2.60488	4.08252	0.873422	0.29866	1.65804	3.0172	0.337737	0.607678	3.15211	1.32373	26.1701	2.02372	13.2182	1.46646	2.48448	0.233902	7.16847	2.55669	0.818453
TCGA-AA-A00D	1.58356	0	8.31925	0.824866	3.13057	1.2507	0.970342	0.738865	0.55491	0.314628	0.511056	0.669901	0.772217	0	3.47729	1.49912	0.356866	1.11517	0.688226	42.8521	1.42588	9.88311	5.93994	7.04398	0.48429	0	0.447754	0.252335	0.499396	1.26317	0.482318	1.22815	0.483705	0	1.75299	0.202538	0.872854	0.448713	1.97488	1.0752	15.5162	3.80697	12.984	1.16019	1.72337	0.74843	3.43397	0.363053	0.185954
TCGA-A6-2678	1.19726	0	15.7874	0.0601181	1.03217	0.599367	1.0103	0.621348	0.475479	0.171981	0.425679	0.488239	0.500275	0.0542488	2.86489	1.79186	0.629256	0.464435	1.50478	29.0986	1.11345	2.88122	4.3209	8.54113	0	0.0717646	0.150615	0.0919537	0.169853	0.345234	0.503993	0.325493	0.705071	0.160729	1.94685	1.47614	0	1.02198	0.993829	0.213717	10.3351	2.46344	13.3788	3.55141	1.53965	0.629392	3.05585	0.158761	2.10068
TCGA-G4-6627	3.92877	0	4.17757	0.356963	2.25794	0.600558	0.35993	0.639493	1.48302	1.44666	0.663483	0.096634	0.482704	0.128845	0.981396	1.6089	0.318834	0.827302	0.785194	49.5993	1.19004	3.13643	9.19308	5.91762	0.335325	0.340893	0.871951	0.163798	0.677161	0.13666	0.822325	0.773072	0.244212	0	0.288995	0	0	0.594683	0.93603	0.634493	7.77844	4.60371	16.2366	6.35964	0.866082	0.373714	2.70118	0.408492	0.281653
TCGA-AD-6888	1.29315	1	5.06167	0.324051	3.00143	0.611371	0.953005	0.390742	0.0245493	0.347633	0.573628	0.657932	0.730331	0.0974715	0.29697	2.31648	0.214817	0.417236	1.55669	49.0502	2.43404	0.647102	6.45357	4.81725	0.0951275	0.419064	0.276256	0.165218	1.27523	0.671991	0.635406	0.219311	0.0527848	0.0721973	0.838061	0.165766	2.00027	1.87296	4.38718	0.959987	6.07046	2.50428	24.6539	5.03896	1.05558	0.376953	10.7514	0.261482	0.319605
TCGA-AZ-6608	0.161644	1	16.1782	0.0585314	2.24786	1.32514	0.983631	1.35105	0.0106421	0.376744	0.595763	1.02993	0.334862	0.158451	2.73564	5.19114	1.15995	0.395655	3.50728	93.0621	4.3001	1.63635	8.27698	5.78097	0.0343646	1.11793	0.45825	0.13429	1.24028	1.28847	1.45146	0.356515	0.829475	0.156487	1.91521	0.790451	1.45993	0.716402	4.71287	1.21378	26.4615	5.04931	36.7578	1.20744	1.77515	1.06215	7.33702	1.39114	1.64114
TCGA-AD-6548	1.78082	0	7.64489	0.118159	4.80475	0.650368	0.496421	0.895567	0.480692	1.22532	0.522906	0.63974	0.399452	0.0266558	0.48728	1.78238	0.33805	0.741668	1.68044	52.7951	2.079	4.64042	5.22054	4.62769	0.381551	0.14105	0.610555	0.0903651	1.16843	0.848175	2.76361	0.439821	0.461927	0.0789761	1.22565	0.253862	0.0893094	0.723111	1.66706	2.27526	19.7076	3.72051	27.4818	0.914063	1.53296	0.350494	3.81157	0.624073	1.31521
TCGA-AG-A02X	3.41644	0	12.6936	0.20368	2.20863	1.35377	1.5403	0.0701711	0	0.631229	0.360551	0.275693	1.05933	0.0918977	1.67993	10.9571	0.312682	0.196688	3.47606	32.7544	2.7664	1.62693	11.4203	5.81843	0.239168	1.94511	0.489024	0.31154	0.904301	0.389885	1.32011	1.24062	0.895794	0	0.480954	0.12503	0	0.865615	2.11895	0.241358	13.4904	3.25061	31.5081	0	0.823633	0.924033	9.08836	0.448236	1.34881
TCGA-DY-A1DE	10.7726	0	10.4252	0.467016	2.66191	3.52936	2.17337	1.33666	0.623776	0.97631	0.476943	1.75052	1.23315	0.129668	0.658442	4.38745	0.57155	1.1795	4.93199	30.4346	9.44802	2.39126	5.23807	7.03622	0.210917	1.45805	0.360008	0.054948	0.782984	1.16903	2.94587	0.43763	0.596875	1.24859	1.30878	0.882088	0.217224	1.45345	1.10583	0.170278	28.9919	5.43887	29.7167	0.808453	1.52532	1.02801	9.01462	2.56148	4.51498
TCGA-AA-3673	4.16986	0	2.96505	0.109343	3.31	0.73811	0.459383	0.904089	0.566596	0.260667	0.193557	0.740011	0.113738	0.197336	2.10431	1.55003	0.381498	0.950306	1.49286	94.5422	2.97021	2.32905	10.6538	4.80993	0.256788	0.0652629	0.536466	0.167246	0.904724	0.209305	0.558473	0.888013	1.01522	0	1.43851	0.0671205	0.909106	0.539045	1.97899	1.23091	17.8275	2.75906	18.3985	0.871496	0.626388	0.228948	5.98553	0.192503	0.415966
TCGA-A6-6649	0.89863	0	4.0811	0.287548	1.55902	0.731631	1.36915	1.94827	1.21772	0.548396	0.572637	0.194606	0.498508	0.237852	0.570954	1.55036	0.451464	0.879309	1.83571	37.463	1.65687	1.53122	1.72555	5.60722	0.70343	0.286044	1.10061	0.109955	0.609312	0.596293	3.41167	1.45955	0.585484	0.192193	0.808322	1.50035	0.10867	1.4583	0.887872	1.41974	12.1024	5.53995	10.0409	2.87603	2.03485	0.602082	3.51628	0.400774	0.371384
TCGA-CK-4947	1.46301	0	5.70003	0.128833	3.75448	0.481667	0.108254	1.04305	0.770072	0.829252	0.31358	0.174383	0.636555	0.145319	0.354201	0.725846	0.836069	0.435438	1.44137	40.7486	1.51121	4.97387	5.68331	4.18929	0.30256	0.38448	0.853994	0.394114	0.220998	0.18496	1.20486	0.610341	0.629571	0	1.16254	0.118627	0.146066	0.514674	0.523265	0.152665	7.4567	2.68126	14.9997	0.936236	1.04194	0.314718	3.03729	0.481986	0.39935
TCGA-AG-A023	4.33151	1	7.7871	1.54294	1.81858	0.905691	0.789154	0.785793	0.567167	0.575728	0.534379	1.08963	1.53517	0.0605348	4.79529	6.29107	0.365129	1.0365	1.47562	34.1345	1.40813	1.25031	9.3205	4.36277	0.157544	0.560562	0.728293	0.307826	0.974751	0.513651	0.798692	0.544814	0.262257	0.53806	0.837293	0.0823596	1.72397	0.843893	2.2371	1.1924	12.4687	3.41441	12.3802	0.88065	1.08509	0.421393	5.63181	0.236209	0.926294
TCGA-AA-3552	1.08493	1	8.15195	0.407987	1.76962	1.66092	0.959883	0.618455	0.348644	0.350141	0.288884	0.441787	0.424386	0.147262	6.87961	5.22004	0.170816	0.315185	1.42351	18.9708	1.20901	2.60709	3.61077	3.09967	0.47907	0.38962	0.766605	0.748845	1.67965	0.78097	0.465623	0.441787	0.55824	0	1.51389	0.40071	0.370048	0.277423	1.79079	0	12.7908	3.44918	20.6391	2.14235	1.04487	0.341706	4.67316	0.430968	1.17268
TCGA-A6-6653	0.772603	0	3.32602	0.0360378	0.390778	0.127248	0.242249	0.0993245	0.176913	0.429558	0.255173	0.195116	0.224917	0.0650388	0.330261	1.30991	0.100588	0.208804	0.683365	63.629	1.24592	0.767619	2.03053	2.99532	0.12695	0.0430192	0.120382	0.165365	0.814547	0.482884	0.606775	0.146337	0.211327	0	0.510579	0.176975	0	1.34777	0.184888	0.811377	5.51872	9.66854	9.74126	0.439295	0.340031	0.0503051	1.39252	0.0951691	0.385899
TCGA-QL-A97D	1.82466	0	2.43235	0.887641	1.18711	0.988209	1.01435	0.758399	0.142023	0.914146	1.82269	0.192236	0.480125	0.128157	1.692	2.0391	1.31312	0.137147	3.36638	101.823	3.288	4.53771	3.31798	6.30682	0.500301	1.61059	3.89912	0.706	0.114646	1.08744	1.25316	2.49906	0.277609	0	0.25152	0.217952	0.32204	0.325932	1.28523	1.05184	28.2198	1.4549	19.7345	0.898911	1.91435	0.817779	3.56873	1.59399	0.620328
TCGA-WS-AB45	5.83562	0	1.21147	0.0812716	0.220319	0.157551	0.546314	0.895979	1.55401	0.762069	0.28773	0.440023	0.140897	0	0.546185	1.2998	0.207942	0.418569	0.904119	18.1137	0.702441	2.66881	0.00372294	4.38395	0.318105	0.0323387	0.09615	0.290055	0.0109342	0.259284	0.969513	0.330017	0.0794301	0	0.283292	0.0665183	0	0.276315	0.424677	0.0321018	3.32725	15.3308	3.76431	3.14988	0.310384	0.189079	0.965793	0.166929	0.129777
TCGA-D5-6928	0.969863	0	3.5125	0.392034	0.531381	1.30284	1.42744	0.78786	1.07512	0.716514	1.73492	0.26532	0.373808	0.02948	0.658665	0.759988	0.218849	1.13573	1.16465	35.461	1.81521	23.7467	0.0224481	8.31984	0.959036	0.896964	0.654781	0.299818	0.356022	0.750432	1.88264	1.59192	0.351222	0.0873436	0.220408	0.360976	0.0987718	3.17668	1.32224	2.51633	11.8854	4.52335	8.19242	1.31724	0.638518	0.54724	2.2392	0.747709	0.386655
TCGA-G4-6304	4.46849	0	18.5159	0.128451	8.82147	1.14723	1.51105	0.486785	0.0700639	0.275596	0.966367	1.56479	0.40084	0.057955	0.824012	3.36165	0.304752	0.992329	2.72803	60.0612	3.33065	0.684013	23.7248	5.9237	0.0754152	0.690007	0.522942	0.196472	0.362915	1.10646	0.945638	0.69546	0.75324	0	1.21325	0.709647	0.582529	0.327539	2.85568	0.989375	17.6902	7.03644	20.0797	0	1.99112	0.493087	4.40207	1.41339	1.33928
TCGA-AA-A01C	1.25205	0	6.79636	0.455937	2.60933	2.52534	2.04323	0.523591	0.483569	0.434769	0.134515	0.822848	0.474262	0.137141	3.89979	3.64596	0.530254	0.293523	1.03748	36.0793	7.69379	0.404652	4.19805	5.79636	0	0.181421	0.380756	0	2.82171	0.872755	0.588869	0.411424	0.891212	0	0.71774	0.559755	1.14872	0.465041	3.68197	1.08055	12.9065	5.5065	37.2863	2.28012	2.04855	0.318221	8.14468	0.535131	1.62742
TCGA-G4-6317	3	0	15.2139	0.210393	3.49817	1.04879	1.34357	1.07276	0.0726813	1.08338	0.33519	0.68347	0.481469	0.113912	3.1621	3.60959	0.358222	0.48761	0.829833	84.5392	3.58496	1.68055	4.75915	3.82351	0.24705	0.351613	0.421683	0.0643615	1.29076	1.04711	0.394263	0.740426	0	0.1125	1.09297	0.464941	5.27959	0.329045	2.8904	0.349037	16.4393	1.28865	26.5854	6.03683	1.90007	1.70339	11.672	1.29642	0.830027
TCGA-AA-A01Z	3.08493	0	15.2905	1.1904	1.92086	0.565147	0.142892	0.585874	0.556551	0.648649	0.225774	0	0.353785	0.460364	4.83122	4.69778	0.201732	0	3.74066	56.6813	0.524938	0.679179	4.52214	2.93285	0.399372	0.507505	0.284032	0	0.343191	2.27867	1.28189	0.345273	0.332408	0	1.95043	0	0	0.433633	3.17479	0.201515	19.1434	6.12484	21.3224	0.239189	1.77648	0.118692	6.14086	0.299393	0.910503
TCGA-3L-AA1B	0.956164	0	0.963626	0.244463	2.55618	1.7409	1.1151	1.29941	1.34613	1.24882	0.587294	0.472706	1.23512	0.0630275	1.9843	2.00566	0.258316	0.944284	1.90723	137.305	3.27719	1.02284	20.1285	7.27	0.943182	0.875466	2.24568	0.213668	0.888028	0.735352	1.00872	2.31626	1.63834	0	0.730403	3.08703	0.580722	0.415574	1.65235	0.827669	18.6731	5.25719	11.7905	3.99512	2.58905	1.24311	6.69106	0.676324	0.433012
TCGA-AA-A02J	0.419178	1	5.14196	0.434823	2.30138	0.503182	1.14829	0.898819	0.0395293	0.621953	0.604775	0.504477	0.323071	0.0560531	3.64329	3.16101	0.303419	0.839792	1.27214	36.8035	3.29804	1.48852	6.96582	4.82318	0.0729402	0.593211	0.531717	0.190024	0.601722	2.97264	1.47037	0.336318	0.06071	0.664298	2.11637	1.44898	0.845117	0.527983	3.32851	3.16515	17.527	1.44684	12.8123	0.757204	2.0095	0.216775	8.88667	0.328082	1.41785
TCGA-AA-A02R	1.83562	1	4.09964	0.134648	0.547525	0.349588	0.452558	0.371107	0.257055	0.802481	0.0595878	1.27578	0.14006	0	0.246791	0.342596	0.366434	1.17023	0.612783	31.2271	0.997526	4.83985	0.0370082	5.64687	0.395269	0	0.0702786	0.102975	0.489118	1.41759	0.886919	0.182254	0	0	0.545051	0.330616	0.101773	0.709573	1.43916	0.159555	17.3028	23.2603	9.79339	0.126257	0.907472	0.328922	2.55499	0.592635	0.701947
TCGA-AA-3681	0.49863	0	4.13223	0.184808	3.33996	0.710131	0.621147	0.509354	0.168007	1.18954	0.408929	1.00059	1.34565	0.0833827	3.726	0.671746	0.644795	0.535392	2.17274	42.9932	0.912754	3.44442	0.533344	5.99539	0.108503	0.441221	0.385837	0.141337	0.745919	0.707519	0.98297	0.62537	0.451551	0.494094	0.342878	0.113445	0	0.816826	0.684766	0.218994	16.2038	3.78641	11.5358	0.866455	1.86829	0.38696	2.80543	0.650725	2.005
TCGA-A6-2677	1.48219	0	13.7187	0.282714	4.39406	1.84384	0.665148	1.32463	0.190189	0.727888	0.500453	0.153067	0.235261	0.153067	4.1454	1.56198	0.331426	0.546017	1.07219	45.6025	3.63039	0.903287	7.30419	6.58977	0.0663941	0.539972	0.814532	0.34594	1.14108	0	0.438169	0.535736	0.442092	0.15117	0.190736	0.416506	0.769271	0.519046	1.25704	1.60805	21.7882	2.95104	17.3709	2.33284	1.29565	0.473568	5.65718	0.796367	1.48181
TCGA-DM-A1D6	1.56164	1	1.49948	0.369669	3.19979	4.14623	1.14438	1.3406	0.0689813	0.946202	0.223867	0.526703	1.55835	0.0526703	0.677552	2.09332	0.958506	0.450921	1.04779	109.416	2.066	0.207213	2.19785	9.96295	0.274153	1.23095	0.580869	0.357112	0.212028	0.148973	2.41511	0.711049	0.627508	0	0.0393791	0.62105	0.0294117	0.549039	0.565637	0.0691659	14.837	4.74995	9.31442	6.36707	2.4783	0.801191	10.4357	1.71268	0.153515
TCGA-DM-A28M	7.93151	0	2.09758	0.148623	3.96185	0.39616	0.333018	0.443758	0.0495409	0.791285	0.548101	0.871733	0.231894	0.0894085	1.72523	2.44899	0.0829671	0.621923	0.901842	85.9914	1.86568	2.17644	0	6.83892	0.145431	0.325261	0.460264	0.189438	0.949791	0.0948313	0.486867	0.234697	0.0242092	0.0662251	0.534773	0.577805	0.599121	0.269494	1.2567	1.32086	10.6971	6.16485	20.4096	6.06219	0.801324	0.501368	3.24176	0.610533	0.376929
TCGA-AA-3947	2.75068	0	7.59395	0.920917	3.60607	0.382557	0.515873	0.63454	1.18603	0.658622	0.407547	0	0	0	1.40659	0.446317	0.257046	0.296434	0	98.0216	2.84272	0.81733	2.86864	8.04613	0	0	0.288399	0.234765	0.0619498	0	0.800154	2.07752	0.450025	0	0.155327	2.82653	0	0.208735	1.66238	0.545635	41.8268	0.595833	12.8297	0.143921	1.75854	0.964132	1.94163	1.89153	1.73006
TCGA-A6-6654	1.09315	0	2.14324	0.0652913	0.914489	0.352594	0.274308	1.12469	1.28505	0.762687	0.288943	0.265126	0.101873	0	0.47868	1.82739	0.510275	0.44135	1.28761	56.6228	1.81389	1.47765	6.74299	6.75122	0.230001	0.11691	0.245364	0.299599	0.118587	0.124981	0.919937	0.353502	0.0638119	0	0.660743	1.64325	0.493499	0.910133	0.474541	2.32107	3.36846	12.4337	21.547	3.33662	0.374031	0.227851	3.99459	0.258634	0.754348
TCGA-AA-A00W	1.24932	0	10.436	0.536911	0.90103	0.939946	0.257797	0.951296	0.0209186	0.694836	0.271551	0.20764	0.558491	0.276853	7.31034	1.7843	0.513815	0.148137	1.97806	74.981	1.32588	0.612666	8.43262	5.94393	0.270196	0.549365	0.720609	0.469276	0.185749	1.76187	1.01046	0.93438	0.299855	0.410132	1.00908	0.0941669	0.695691	0.938799	1.46473	1.99958	15.4057	1.81962	22.1485	3.3084	0.98218	0.481805	6.47448	0.540146	0.302597
TCGA-AA-3855	2.67123	0	2.10791	0.443085	1.48715	0.880867	1.38285	0.479756	0.333753	0.905388	0.728315	0.171354	0.855946	0.0571182	3.94455	1.28843	0.591868	0.978	1.58438	103.069	1.09418	8.59523	3.23594	4.83789	0.0743262	0.377802	1.11007	0.0968173	1.17522	2.54446	1.35561	0.856773	0.309318	0	0.341637	0.233133	0.0956863	0.753221	1.17268	0.525048	16.8024	3.08518	14.4987	1.24642	1.57842	0.265073	8.77892	1.05867	0.392414
TCGA-A6-6138	0.767123	0	3.47346	0.102354	1.07905	0.425188	0.114672	1.03437	0.595514	0.569346	0.0603949	0	0.212936	0	0.87547	0.868092	0.447582	0.527149	0.698719	60.5347	1.4323	4.72373	10.8684	6.51655	0.280436	0.610914	0.249307	0.469667	0.0137707	0.130617	0.44466	0.0923613	0.0666899	0	0.517907	0.0418868	0.46418	1.22958	0.583463	0.889443	5.59499	4.88579	18.5928	3.45512	0.528865	0.404815	4.13551	0.510563	0.490328
TCGA-CI-6624	4.01644	0	9.08459	0.124403	1.63001	0.5943	0.365858	1.11433	0.763383	0.637623	0.302797	0.420967	0.194105	0.112258	0.513031	2.57745	0.312511	0.540597	0.754878	24.3925	0.844826	2.48422	1.08133	3.72388	0	0.259881	0.31167	0.380562	0.200846	0.178599	0.556516	0.168387	0.0607922	0	1.24846	0.381826	0.282087	0.338366	1.35625	0.442246	2.57153	3.2598	12.6945	6.50327	0.733622	0.282188	2.24613	0.164263	0.508314
TCGA-AA-3968	1.83288	0	12.2395	0.0779625	2.18393	1.9108	1.44119	0.966934	0.65205	0.446058	0.345019	0.844213	0	0.281404	5.42999	2.26704	1.0554	0.150572	0.946152	42.2784	12.7067	1.45305	7.52126	11.0053	0.274637	0.558396	0.651071	0	0.912546	1.34312	1.2907	2.21606	0.152392	0.416874	0.92047	0.574289	1.2964	0.318077	1.53325	0.184768	26.1744	3.69906	15.2341	5.11728	3.83567	1.63242	8.46374	1.92159	1.0765
TCGA-D5-6922	0.843836	0	5.89539	0.115276	2.86459	1.2271	0.726463	2.74029	1.13966	1.18169	0.841743	0.546114	0.479637	0.0780163	0.475391	2.91211	0.619385	0.89055	1.26783	36.9842	3.30929	0.920785	1.91291	4.37903	0.947522	2.16733	1.49817	0.0440801	0.18611	0.992976	1.28718	1.28727	0.168996	0.231147	2.36233	0.672243	0.304956	0.607486	1.47031	0.2732	12.4554	2.08834	10.3553	1.18901	1.00999	0.603427	7.71554	0.482003	0.70653
TCGA-AF-2692	1.12877	0	3.99297	0.809876	1.86284	1.66686	0.866099	1.0146	0.609081	0.807381	0.912307	0	0.689259	1.59449	6.61229	2.35501	0.534306	0.142195	1.84287	15.3759	2.72722	0.392061	5.61548	5.23565	0.345811	1.4941	2.12123	1.35136	0.386314	1.6912	2.21476	0.996558	0.431741	1.37789	0.397376	1.8078	0.111298	0.225286	1.97257	1.5704	18.5164	3.96962	12.6282	2.89955	2.08405	0.92496	5.50356	0.583291	0.663909
TCGA-G4-6320	2.20274	0	11.3114	0.169833	1.6114	1.04062	0.499463	0.994671	0.177553	0.425114	0.52611	0.804574	0.750801	0.0383131	0.70038	3.64215	0.556994	0.410007	1.12716	79.5578	2.72608	1.13047	1.82631	8.38049	0.149567	0	0.381165	0.32471	0.102821	0.406368	1.08877	0.919514	0.373466	0.340543	0.200514	0.781892	0.3851	0.230966	2.21458	0	15.9294	17.398	27.8853	0.318498	0.915682	0.681576	6.46479	1.00912	1.29217
TCGA-AA-A01K	2.58356	0	5.5315	0.31425	1.41983	2.15395	1.05621	0.974376	1.8855	0.824067	0.556279	0.425355	0.326881	0	1.15195	2.17027	0.504352	0.606925	1.07261	84.845	2.32809	0.836707	0.302302	11.269	0.553502	0.562693	0.426453	0.480662	1.45863	3.30846	0.896609	0.425355	0.614259	0.420082	0.68904	0.964515	0.475046	1.33552	1.1196	0.744761	18.865	5.69296	23.8799	1.91533	2.64739	0.877324	8.42046	0.691564	0.531324
TCGA-AA-3952	0.167123	1	4.34287	0.616807	4.06877	11.8377	0.310967	0.297499	0.801849	0.20586	0.545929	1.33581	0.449119	0.667906	2.26104	5.56013	0.120514	0.595633	0.98248	29.8905	1.06623	2.46342	0.033906	4.05822	0.144854	0.515409	0.30906	0	1.51862	0.944554	0.756086	0.751395	1.80849	0	4.34862	0.0757256	0	0.419416	2.30303	0.438543	8.05373	6.49161	7.49938	3.23886	2.28636	0.861001	5.85914	0.488662	1.3036
TCGA-AA-3955	1.74795	0	17.2136	0.411173	2.50795	0.854025	1.03648	0.354138	0.429863	0.245052	0.454906	0.556546	0.855398	0	1.31884	1.79345	0.760328	0.198529	0.701717	58.5904	1.39614	0	4.76061	3.43626	0.120703	0.981656	0.343374	0	6.22338	1.7709	0.861755	1.11309	0.301392	0	3.67558	0.504799	0	0.698972	0.966845	1.4617	26.0646	2.17257	15.3993	4.33743	3.25608	0.430467	14.0438	1.35729	0.376565
TCGA-AA-3970	3.00274	0	12.4059	0.612555	3.87467	0.617977	0.735294	1.14562	0.373897	0.500672	0.309809	1.18447	0.18205	0.236894	0.641559	1.78123	0.488504	1.69008	1.72574	49.247	1.08049	4.65989	2.63366	6.32926	0.822034	0.104461	0.292314	0.133848	0.600436	2.1776	0.80759	1.06602	0.769726	0	2.09586	0	2.24883	0.83305	1.67109	1.65912	16.31	3.73676	11.2095	4.43094	0.88465	1.2826	12.1568	1.69468	0.345229
TCGA-F4-6704	0.128767	0	9.7442	0.150606	2.97702	0.789859	0.854199	0.635604	2.12046	0.2603	0.283261	0.407707	0.156659	0	0.27604	6.61018	0.302142	0.763538	0.8282	38.816	2.69639	1.25311	0.238017	5.05174	0.0663171	0.943857	0.169006	0.0287949	0.0987793	0.396398	0.576917	0.45867	0.496777	0.0503316	1.02243	0.0462248	0.0284585	0.166414	2.36093	0.312314	9.16437	8.52617	10.9949	1.78291	2.74056	0.630692	3.70647	0.331435	0.13793
TCGA-CM-4743	0.50411	0	8.98377	0.642858	4.03004	0.475682	0.405126	0.19379	0.0803573	0.440603	0.497864	0.217536	0.376142	0.18128	0.0736419	1.63568	0.229901	0.232796	1.91996	41.9545	3.37347	2.8884	0.0552158	4.18811	0	0.0479623	0.243263	0.184366	0.66489	0.69219	0.761413	0.27192	0.0785365	0	0.203302	0	0	0.915242	1.79793	0.47611	18.7769	5.80568	22.2446	0.376748	2.19338	0.392598	2.79085	1.02568	0.396274
TCGA-AA-3877	2.58356	0	6.97084	0.7901	1.75245	0.537079	1.20707	0.544403	0.861927	0.410956	0.381441	0.972223	0.149428	0.0648149	3.68618	1.72313	0.390944	1.38723	1.47099	40.5674	2.66063	5.16358	1.13515	7.87998	0	0.0857422	0.299918	0	0.492844	0.962443	1.00697	0.875001	0.210599	0	0.484591	0.176365	0	1.34313	2.23149	0	14.7236	6.63004	14.659	1.68378	1.01658	0.451187	2.70937	0.316138	0.688178
TCGA-D5-6539	1.0411	0	1.89598	0.320252	1.92927	0.716915	0.657788	1.02976	0.0355836	0.32235	0.377935	0	0.185069	0	0.521758	1.08646	0.322793	0.618517	1.24154	24.7367	2.41649	2.08435	2.89494	3.51989	0.334266	0.382294	0.854339	0.217707	0.172346	0.544913	0.980164	0.433479	0.243441	0.190269	0.600171	0.0436861	0	0.447627	0.82151	0.168663	6.28278	2.01064	19.9709	3.87046	0.623528	0.397369	3.29829	0.219262	0.210572
TCGA-BM-6198	0.849315	0	2.49902	0.465452	1.23175	1.39491	0.893945	0.985041	0.541013	1.28398	0.706229	1.08003	0.899155	0.330008	0.121873	11.287	0.519668	0.128421	1.63914	88.2383	4.72082	4.16047	1.37525	8.44155	0.156156	0.674685	0.721877	0.101705	0.389149	0.95461	1.0938	0.450011	0.227453	0.0888865	0.728981	0.285719	0.0502583	0.158249	1.74359	2.48199	17.221	8.24571	20.9331	1.55873	3.67472	0.765748	4.50399	1.5511	1.5552
TCGA-AA-A02H	0.167123	1	5.53779	0.465619	2.10374	2.07929	0.391241	0.802065	0.317468	0.222001	0.824229	1.26048	0.242167	0.210081	5.5472	1.01547	0.3574	0	1.05952	98.7173	7.18644	0.619868	7.74255	7.88868	0.546744	1.11164	0.923501	0.712188	0.845696	0	1.11528	1.89073	0.455069	0	0.471203	1.14329	1.0558	0.55407	1.39347	0.55175	13.5148	3.61507	24.5149	1.74641	1.25523	0.324979	7.55013	1.22961	0.131209
TCGA-D5-6926	0.753425	0	8.7738	0.165851	1.70849	1.70862	1.33783	1.75985	1.32379	0.300487	1.40921	0.628567	0.41404	0.149659	0.547167	2.74895	0.671238	0.640629	1.15734	59.1304	1.80208	1.14812	8.70204	6.42119	0.817936	3.20728	0.990299	0.202942	0.830061	1.01591	1.7783	1.8857	0.129674	0.0886822	2.69662	1.75109	1.50428	0.699205	1.28577	0.235836	18.1985	4.09191	15.7717	1.71067	1.07305	0.486173	10.2156	0.846764	1.08427
TCGA-AG-4008	1.41918	0	9.36407	0.17116	1.93331	1.11984	0.143818	1.35624	1.40818	0.571247	0.454474	0.695022	0.356078	0.0772247	2.03913	2.86183	0.370249	0.330568	0.778947	26.4384	1.90203	0.911442	4.35152	5.4876	0.502451	0.612953	0.303741	0.130899	0.863539	0.163817	0.633042	0.579185	0.0836407	0	0.721717	0	0.905586	0.843791	2.24408	1.52116	13.2529	4.28196	15.4219	2.00616	1.15354	0.358383	6.88928	0.753335	0.65113
TCGA-AA-A02K	1.16712	1	3.82977	0.318533	1.43918	3.15768	0.924611	1.61617	0.134258	1.51873	0.30756	0.940697	0.632551	0.182913	0.902278	0.989405	0.484958	0.55927	5.77661	41.6559	1.28717	0.77101	7.4775	5.97091	0.510042	0.691349	0.652933	0.620089	1.85836	1.94007	2.70915	0.313566	1.01885	0.232259	0.674011	0.426616	0.0437746	0.443037	4.3001	0.720598	18.4213	2.598	38.1627	0.380142	3.20066	0.626539	6.10754	1.50394	0.375364
TCGA-G4-6310	3.7589	0	10.6146	0	1.44725	0.848855	0.742487	1.29382	4.31277	0.210654	0.488812	0.299014	0.459578	0	1.82204	2.56951	0.493283	0.746643	0.67024	77.5339	4.84158	0	8.85715	9.63376	0.0648497	1.12075	0.380498	0.844733	0.0222908	0.105717	0.482447	0.224261	0.431809	0.147654	0.782457	2.1697	1.00184	0.337982	1.00743	0.0654436	9.03769	2.57272	25.3003	9.63216	0.37221	0.578191	6.23694	0.291691	0.38907
TCGA-CM-5860	0.832877	0	2.79926	0.127915	1.38705	0.132842	0.501581	0.558202	1.39543	1.40273	0.113216	0.34628	0.399168	0.0384755	0.23445	2.23175	0.523652	0.329396	1.13194	144.699	1.89529	1.81642	2.91807	4.26308	0	0	0.267056	0	0.516287	0.0816182	0.582738	0.34628	1.16682	0	0.186981	1.25633	0.0644555	0.79731	0.875004	0.555781	14.6895	7.13582	14.8581	2.75869	1.49429	0.208316	5.71745	0.412866	0.877111
TCGA-AA-3562	1.66575	0	12.1633	0.728602	1.31678	0.715397	0.556559	0.182556	0.469677	0.221065	0.175876	0.17931	1.10238	0.23908	0.48561	2.50389	0.684054	0.255851	1.85889	29.4043	3.59852	1.58722	0.409617	2.20415	0.0777769	0.632547	0.331888	0	1.39018	1.2679	0.536621	0.35862	0.323679	0	4.49107	0.73187	1.00129	0.653072	2.13331	0.941869	12.585	5.59973	30.5594	1.24218	0.982095	0.0924597	9.55212	0.349837	0.335972
TCGA-QG-A5YV	3.56438	0	5.77507	0.455222	2.98916	1.90364	0.765009	1.19192	0.160017	1.09969	0.590937	0.739402	0.915469	0.0547705	1.61309	2.71363	0.868253	0.527514	3.10757	160.014	4.72145	2.02009	8.31203	7.52576	0.249449	2.93442	1.48896	0.232095	2.14358	1.45231	2.40951	1.23234	0.474567	0	1.00326	1.41582	0.183507	0.546856	1.42723	1.33059	35.9822	3.07619	27.0808	2.81723	1.57491	0.931985	7.23146	1.14873	0.966368
TCGA-AA-3531	2.83562	0	17.6835	0.61079	0.946163	1.30489	2.78606	0.480975	0.0634587	0.0832047	0.231687	0.708633	0.99839	0.078737	4.31804	1.77609	0.645402	0.842603	2.58115	43.6433	0.215475	0.232323	6.53519	4.12337	0.102458	1.04159	0.674028	0.266924	2.50048	2.0043	1.20482	0.590527	0.511671	0.699848	0.500378	0.749869	0.527611	0.682318	1.11914	0.827171	15.8271	2.74745	12.7875	0.163636	4.4105	0.1218	10.2754	0.230426	2.40964
TCGA-EI-6513	1.36164	0	3.80562	0.262756	1.89947	1.15215	0.785006	0.945466	0.236215	1.60078	0.775207	0.711309	0.485896	0.0526896	0.642126	4.77536	1.4831	1.12771	1.17365	25.02	1.73031	1.6324	3.52267	6.01101	0.514225	1.01068	0.761907	0.178621	0.624534	0.838279	0.250924	0.316137	0.0856006	0.468328	2.09771	0.358429	0.882673	0.684895	3.11214	2.87144	13.0052	2.95931	18.0018	3.77784	6.37511	0.326027	4.86164	0.770988	0.921425
TCGA-AA-3556	1.91781	0	4.85183	0.495765	1.02397	0.294208	0	0.487996	0.43138	0.945497	0.12537	0.191727	0.294681	0.0639091	0.12981	2.11094	0.227335	2.59891	0.966954	24.3517	0.524689	2.07429	0.0681308	4.65977	0	0.084544	0.0591453	0	0.142928	1.22013	0.703508	0.383455	0.138438	0	1.26622	0	0.107063	2.5524	2.059	0.0839246	4.41637	4.42954	9.30296	0.929739	0.763714	0.197725	3.99097	0.249376	0.119746
TCGA-EI-6883	0.958904	0	5.30039	0.172291	2.56884	0.990068	0.868614	2.0577	0.352413	0.369657	0.635386	0.544146	0.627255	0.0518234	0.368416	1.85787	0.336629	0.831882	1.74243	211.439	1.66641	3.51695	7.34387	6.9681	0.0337181	0.51417	0.581521	0.0878425	0.0463598	0.824498	0.467299	0.466411	0.0280645	0	1.48203	1.23388	2.30063	0.85913	4.23136	0.646511	16.798	4.00061	11.0973	0.511587	0.425762	0.360751	13.1431	0.556097	0.396496
TCGA-A6-2680	1.43014	0	4.55851	0.563649	0.827663	0.760972	0.355209	0.145639	0.134507	0.167963	0.43652	0.381466	0.36644	0	6.84423	3.48291	0.924289	0.680375	1.71011	45.2396	0.782951	3.00149	8.42376	3.02973	0.0827317	0.504633	0.647224	0.107766	0.398124	3.50655	0.893437	0.190733	0.275439	0.188368	0.356505	0.259498	0	0.622813	1.16473	0.834893	11.3235	5.07515	9.63713	2.51049	1.47202	0.590099	4.95878	0	1.01256
TCGA-AA-3520	2.00274	0	6.60903	0.429657	1.61772	0.49083	0.361023	0.740117	0.540326	0.477995	0.380285	0.193855	0.446926	0.0646183	1.44375	1.24938	0.349784	0.138302	1.35789	67.7309	1.76837	1.52531	10.028	4.03686	0.336344	0.256447	0.403661	0.10953	0.0867087	1.0966	0.892928	0	1.39974	0	0.821307	0.615407	0.757756	0.365197	0.530667	2.63053	20.3779	3.36674	16.0916	3.08876	0.627404	0.299879	3.96938	0.315179	0.383404
TCGA-AA-A02E	0.246575	1	7.68558	0.685832	1.99694	1.44033	1.02449	0.840105	0.311742	0.908322	1.34894	0.412583	1.50606	0	3.49176	3.93322	0.553018	0.147175	1.67621	40.797	3.01091	1.01448	3.46634	9.06641	0.268441	1.00063	0.668201	0.233114	0.307571	1.31282	0.987792	0.309437	0.968199	0	0.565527	0.561332	0.115196	0.595893	0.71675	2.4381	13.1266	2.82674	9.43057	0.857456	1.54074	0.585049	3.90854	0.402479	0.944844
TCGA-CM-6674	0.410959	0	3.15203	0.1616	1.56979	0.167825	0.271572	0.389716	0.6464	0.712701	0.0357576	0.328102	0.0840475	0.0364558	0.370238	1.20415	0.225529	0.546184	0.766084	23.9945	2.04521	1.72107	0.011104	4.70842	0.0474388	0.241133	0.101215	0.0617938	0.0489185	0.232001	0.6973	0.0546837	0.197423	0.108012	0.299819	0	0.0610719	0.425803	1.10543	0.0957465	4.10593	19.6564	26.4019	9.50846	0.599014	0.140986	1.99781	0.213378	0.580609
TCGA-AG-3887	3.07945	0	14.1047	0.179687	3.3286	0.466522	1.05689	0.0619049	0.383876	0.299853	0.159039	0.243216	0.467272	0.0810721	1.81137	2.4819	0.639466	0.347037	0.954046	38.3292	1.88585	2.15291	10.9516	2.9078	0.31649	0.750739	0.243844	0	1.77686	1.89176	0.810156	0.972865	0.351231	0	1.66688	0.551505	2.58048	0.610916	1.25476	2.12926	14.3774	4.49528	17.263	2.19036	1.33211	0.250825	8.84432	0.23726	0.632934
TCGA-CM-4744	0.586301	0	3.6889	0	2.38768	0.25133	0.373498	0.0680614	0.132453	2.34304	0.109285	0.267404	0.333933	0	0.226309	1.83112	0.279156	0.524631	1.89181	150.834	2.4393	9.86259	0.0169684	2.40524	0.0869913	0	0.11858	0.0755433	2.28249	0.425434	0.554964	0.066851	0.506836	0.198067	0.033321	0.0303177	0.223982	0.629693	2.39309	0.0585253	11.6427	6.17793	38.4691	0.370491	1.18166	0.344712	4.15197	0.239118	0.271393
TCGA-T9-A92H	0.991781	0	5.09373	0.22044	2.90257	1.58944	0.740906	1.21512	0.0744342	0.420411	0.641071	0.852507	0.524114	0.227335	1.21211	3.20504	0.408729	0.486565	2.26919	26.5428	3.49951	1.25771	8.33952	4.64154	0.18489	0.413513	0.946753	0.481677	1.5761	0.904212	0.66112	0.426254	0.892557	0.336776	1.50847	0.502607	1.09491	0.717351	1.33738	0.783651	19.7891	4.49607	15.1444	0.177173	3.79907	0.813238	4.80944	1.55237	2.30726
TCGA-AF-4110	1.20822	0	11.3291	0.147729	4.51204	0.582995	0.198609	0.407159	0.690296	0.774787	0.156904	0.0799837	0.768332	0.0799837	0.270766	2.85668	0.490685	0.684756	0.986059	112.293	1.09443	4.24802	3.32136	2.30758	0.138774	0.141078	0.511983	0.0451917	0.703587	0.678678	0.403803	0.43991	0.606402	0.0789921	0.259134	0	0.178655	1.07484	0.9937	1.36544	9.76672	5.35251	11.9315	2.99208	1.01554	0.185593	7.27812	0.338108	0.274752
TCGA-AA-3980	0.663014	0	11.039	0.703153	2.85926	0.803265	1.18166	1.25968	0.255692	0.670509	0.248941	0.190352	0.804557	0	2.06205	2.55584	0.657485	0	1.28002	57.0146	4.34103	5.80376	1.43014	5.00028	0.247699	0.419687	0.132122	0	0.397328	1.21138	0.569666	0.761406	0.137444	0	1.06738	0.863264	0.318883	0.239065	1.66344	0.583257	20.4457	3.39689	16.1824	2.24173	0.995182	0.687072	4.98121	1.36173	2.67495
TCGA-F5-6571	1.07397	0	7.86317	0.27365	0.890203	1.50053	0.367899	1.84782	1.63692	0.352276	0.799275	0.14816	0.626227	0.0246934	2.00625	2.96412	0.721802	0.528512	1.59824	152.613	0.43925	1.74866	8.3148	5.18514	0.514124	1.01266	1.26833	0.251137	0.0662701	0.104764	0.429905	0.629681	0.0802348	0.0731618	0.276931	0.167981	1.07555	1.07924	1.18554	0.226989	14.3395	2.30167	12.2688	1.4626	0.719272	0.534784	5.79052	0.289064	0.0539791
TCGA-AG-A00Y	1.91781	0	7.83784	0.265729	2.32117	2.04215	1.78625	1.22064	0.0805241	1.22473	0.313592	0.959146	1.0135	1.03907	4.22106	4.0567	1.14964	1.1975	1.74681	27.6197	3.71852	1.88671	4.723	4.06466	0.520045	0.422944	0.40684	0.135482	2.53833	1.52598	1.23554	0.599466	1.47168	0	1.19518	1.63119	0.401698	0.662531	1.81773	1.78435	18.2943	2.86545	27.2121	0.664452	2.32818	0.556398	6.45821	0.701742	0.574088
TCGA-AG-4005	1.16986	0	9.26628	0.81725	1.66161	0.466803	0.457802	0.234629	0.266226	0.259769	0.421948	0.921829	0.212525	0	2.37168	2.97057	1.08353	0.263065	1.60137	46.0672	2.69089	0.181331	4.08064	4.67747	0.0799699	0	0.270153	0.104169	0.302369	1.17329	0.618922	0.184366	0.199683	0	0.643262	0	0.102952	1.4819	0.737625	1.29123	19.5798	9.78208	8.05858	1.5965	0.826189	0.332733	4.60528	0.299751	1.36259
TCGA-EI-6881	1.36712	0	4.01667	0.179096	2.10387	0.80775	0.214981	0.758043	0.11397	0.45135	0.701997	0.0692617	0.425815	0.0692617	0.468939	1.02297	1.58537	0.296482	1.57191	91.3656	1.86385	3.33796	1.63145	6.0686	0.240342	0.274875	0.587574	0.156535	0.444044	0.48975	0.957092	0.450201	0.475102	0.0684031	0.509207	0.251287	0.812207	0.495824	0.751108	1.48558	13.0762	1.26911	25.1914	0.647748	0.603515	0.214285	3.5661	0.630611	0.216292
TCGA-CK-4952	1.30137	0	3.52169	0.154221	1.087	0.736747	1.45136	0.765095	0.0785126	0.26471	0.436798	0.250497	0.224588	0.139165	0.791465	1.39021	0.817878	0.953133	1.21656	61.4791	3.88461	0.73912	5.70117	4.02124	0.181091	0.552294	0.283341	0.0471778	1.53126	1.29893	2.04256	0.250497	0.84407	0.0824637	0.301737	0.984558	0	0.209734	0.81759	0.0730997	24.7593	11.1489	11.5518	0.202455	0.956236	0.947221	2.30564	1.76484	0.825715
TCGA-AA-3833	1.32877	0	7.49679	0.540726	1.25644	0.272756	0.129814	0.212901	0.610951	0.147321	0.341851	0.209115	0.160703	0.13941	1.13266	1.62851	0.161708	0.596759	1.3476	45.1434	0.85841	3.29077	0.106157	3.90861	0.0907052	0.368845	0.112891	0.118153	1.90187	0.887193	0.457121	0.209115	0.0754963	0	0.44298	0.094836	0.116772	0.735365	1.14488	0.549215	11.7362	7.43015	12.1592	1.88325	0.832976	0.161743	3.00262	0.271992	0.500656
TCGA-AY-A71X	1.61096	0	1.27406	0.133905	1.98441	1.85788	1.84524	1.19944	0.0340848	0.446908	0.971844	0.579992	0.780006	0.072499	1.07989	3.58227	0.186877	0.879294	2.80324	68.6061	1.98404	0.855667	0.0184019	8.509	0.691833	0.479537	1.49845	0.696368	1.32954	1.69172	1.55274	1.55873	1.70132	0.286401	0.388463	1.31516	0.364358	0.273157	2.19072	0.920313	13.9181	5.09422	20.031	1.58205	1.60638	1.02805	4.10853	0.754384	0.46035
TCGA-CA-5255	0.254795	0	5.07554	0.365371	2.80637	0.35668	0.368408	0.528679	0.222544	1.04523	0.517418	0.29673	0.380057	0.19782	0.334837	1.6468	0.275353	0.282263	1.57966	75.324	3.15795	0.291846	0	8.20555	0.343224	0.348923	0.755183	0.223542	0.427664	0.629455	0.777345	0.0989101	0.571348	0.097684	0.505329	0.448568	0.110465	0.496889	1.16636	1.86172	10.4414	7.04458	31.6516	0.445382	0.960356	0.612026	3.4455	0.450277	0.731013
TCGA-AG-4007	0.0849315	0	4.42876	0.698198	1.19172	0.322264	0.391112	0.32072	0.260943	0.406867	0.274652	0.210011	0.161391	0.210011	3.69691	2.76342	0.324801	0	1.70643	40.8612	1.43681	2.2721	1.05545	2.6169	0	0.185213	0.145768	0	2.06657	0.742495	0.349774	0.840044	0.227459	0.207408	0.680401	0	0	0.923144	1.48146	0.0919279	32.4194	6.1235	15.5799	0.218229	2.45735	0.10829	10.3311	0.341446	1.15863
TCGA-AA-A029	4.33151	0	4.69848	0.493812	0.55778	0.461552	1.03733	0.170126	0.123453	0.412025	0.437067	2.00521	0.642075	0	1.13136	1.79492	0.18952	0.23843	1.49822	87.8864	0.762157	0.3287	0.237518	5.8902	0.289924	0	0.128871	0	4.58416	2.12683	0.634888	0	0.120656	0.330058	0.333156	0	0.186622	0.839454	1.58341	0	12.5893	4.7392	24.5251	0.11576	0.665617	0.172328	3.20859	0.543361	0.556614
TCGA-5M-AAT6	0.794521	1	3.32822	0.388664	4.96083	0.736637	0.979737	0.736455	1.47074	1.25084	0.645005	1.70976	0.404286	0.13152	0.178092	2.75482	1.11196	0.187661	2.61636	48.8946	4.79896	2.97516	0.0133531	7.64791	0.285238	0.463959	0.223146	0.297241	1.19615	4.37089	1.73868	0.854878	0.379858	0	1.06526	0.298228	0.0734421	0.512049	1.98016	0.11514	29.1318	9.47188	9.65148	3.18888	2.52121	1.15289	3.09527	1.58235	0.62976
TCGA-DM-A28K	8.1863	0	6.36517	0.177921	2.05792	1.11604	1.495	0.686521	0.0355842	0.152695	0.661399	0.385322	0.481187	0.192661	1.10875	6.20844	0.357561	0.687253	2.42915	77.4344	2.94378	0.568469	0	6.73711	0.125352	1.27433	0.200587	0.272139	0.229799	0.749268	1.35621	0.674313	0.939003	0.190273	0.372113	0.567929	0	0.0604913	0.770813	1.09633	17.8373	6.10876	22.9843	2.1021	1.77469	0.769916	3.21651	1.28428	1.68461
TCGA-A6-5664	0.991781	0	0.552503	0.258081	1.71993	0.402035	0.379497	0.689075	1.54556	1.53812	0.342637	0.261996	0.335568	0.0582213	1.00518	1.87616	0.319658	0.809971	1.07665	45.5413	2.11113	1.20252	7.4924	3.8627	0.340927	0.0385098	0.909249	0.246718	0.611977	0.185257	1.26816	0.392993	0.7567	0	0.424411	1.26739	0.146301	0.537438	0.855121	0.420505	8.28558	9.7265	6.93409	5.11221	0.587034	0.270192	2.03307	0.425966	0.763621
TCGA-AA-3939	1.08219	0	5.56687	0.731352	3.23093	0.438837	0.546245	0.223966	0.561442	0.813631	0.143847	0	0.422637	0	1.34047	1.47686	0.306202	0.156943	0.308183	160.002	2.90974	3.4618	4.92482	7.11221	0	0.0970038	0.135724	0.124293	0.491978	0.15555	0.463704	0.329975	1.82666	0	0.274119	0.19953	0.859889	0.221024	0.856966	2.31103	11.5063	3.64527	15.614	1.67634	1.8073	1.13433	4.20534	0.500724	2.03801
TCGA-QG-A5YX	2.74795	0	1.54101	0.149964	2.73734	0.816082	0.806455	0.826638	0.0327194	0.114401	0.504379	0.162388	0.53037	0.135323	1.64918	2.22398	0.619497	0.753042	1.36497	37.7119	3.66627	0.638858	0.189602	2.80735	0.316965	0.179016	0.701322	0.137626	0.798971	1.03342	1.5995	0.771341	0.293132	0	0.779046	0.184111	0.181358	0.377297	1.40197	0.177704	12.6372	3.04017	14.4563	4.47166	2.28417	0.648937	3.58719	0.633643	0.363427
TCGA-DM-A28H	9.75616	0	6.69674	0.343332	5.06734	1.51537	1.49052	1.32083	0.106641	1.82794	1.11422	0.851985	0.773785	0.180724	5.03424	1.06076	0.806576	0.331546	0.802953	62.3261	7.7366	0.304713	3.90043	7.88622	0.0335959	0.956304	0.764585	0.087524	0.265602	1.69778	2.73719	0.851985	0.223702	0.229479	0.78176	0.84302	0.216254	0.272368	2.73185	5.56018	31.2563	4.03547	17.7348	0.53656	3.91437	1.25805	5.94231	2.06521	0.73368
TCGA-AA-3679	1.25205	0	5.44682	0.592204	1.24865	0.820023	0.663473	0.476054	0.269184	0.705888	0.349435	1.06878	0.513338	0.0890646	0.542713	1.14803	0.59231	0.190625	1.27269	165.727	2.55925	1.83957	4.5575	2.87952	0.115897	0.117822	0.103032	0.150968	0.75691	0.377866	0.479779	0.267194	0	0.263881	2.76346	0	0.447612	0.268457	1.35033	2.33917	11.3063	2.29893	28.3938	2.68394	1.3304	0.688881	5.03973	0.26065	0.16688
TCGA-F5-6861	1.23014	0	4.87861	0.20717	3.60369	0.597042	0.522229	0.963537	0.404922	0.666736	0.595931	0.210312	0.430993	0.0701039	0.474641	0.978934	0.354179	1.0503	2.51421	78.9487	3.42131	1.5169	8.32048	5.13112	0.334489	0.061826	0.767727	0.316876	1.13929	0.892269	1.30988	0.771143	0.86052	0.0692349	0.917235	0.763029	0.234881	1.04773	1.5131	1.99462	11.21	5.68547	19.7909	3.73949	1.04718	0.307262	5.36655	0.501505	0.53271
TCGA-D5-6540	1.34521	0	4.40084	0.382544	1.00561	0.743998	0.525986	0.455282	0.268729	1.11093	0.769512	0.941445	0.470268	0.251052	0.573668	1.51689	0.407689	1.20898	1.34528	17.8158	3.30638	3.42601	0.210285	6.24075	0.163343	0.290597	0.188775	0.106385	0.814118	0.998544	2.52102	0.800228	0.0679774	0.0929774	0.692143	0.128086	0.0525713	1.15872	1.0606	0.700566	14.8506	9.49522	14.1572	0.847846	1.59379	1.04371	2.10367	1.13268	0.450794
TCGA-AG-3894	1.16712	0	1.54498	0.850553	4.47177	0.385448	0.779656	0.479501	0.274145	0.405532	0	0	0.723877	0.069774	1.55895	3.0354	0.237406	1.04536	1.40759	65.5962	0.859259	0.205876	6.20568	1.79762	0.18159	0.276907	0.322865	0	2.52793	1.03608	0.490256	0.418644	1.58699	0.413454	1.30417	0	0.116888	1.07785	0.462814	4.67294	12.6801	3.73542	16.2003	2.03012	0.885912	0.107935	7.68293	0.272261	0.631886
TCGA-F4-6569	1.12055	0	2.26557	0	2.38497	0.119174	0.192845	0.41511	1.80736	1.20368	0.101567	0.155325	0.119365	0	0.157745	1.87699	0.220206	0.664883	0.848642	54.0703	0.566758	0.840225	9.44231	4.04531	0	0.034246	0.125779	0.131641	0.416848	0.549152	0.355705	0.232987	0.196268	0	0.154839	0.0704415	0.260206	0.76079	0.989392	0.747892	3.7261	9.21879	7.94151	2.79765	0.36736	0.100115	2.73834	0.0252535	0.444631
TCGA-A6-5661	0.838356	0	7.21643	0.501454	1.81252	0.19529	0.105338	0.172759	0.17095	0.86669	0	0	0.130402	0.169687	0.344661	1.64043	0.769813	0.6053	1.28369	33.0697	1.7027	3.33787	1.51608	5.61943	0	0.14965	0.392596	0.19175	1.51797	0.839899	1.60295	0.76359	0.367569	0	0.253734	0.153909	0	0.895069	1.89376	0	17.0599	3.05515	18.9167	1.11674	1.18286	0.262493	1.98955	0.496593	1.50139
TCGA-AG-A02N	5.16438	0	7.2311	0.853923	1.77475	1.25928	1.00452	1.52979	0.0543406	0.610709	1.36044	2.54283	0.79942	0.0770556	5.32142	3.2901	0.536281	0.824609	0.77724	33.77	0.843494	1.81889	1.1383	5.83889	0.701891	0.509675	1.05185	0.391836	0.723784	0.980748	2.30404	2.88958	0.500745	0.456602	0.69133	0.314509	0	0.783877	2.40953	0.202377	33.0228	8.06633	11.7728	1.12099	2.30203	2.08599	3.86918	1.35303	0.93846
TCGA-DM-A28E	9.99452	0	7.78148	0.445514	1.03521	1.20957	0.427826	1.18404	0.0491802	0.394486	0.563314	0.258441	0.628929	0.258441	1.74978	1.61937	1.90525	0.614601	2.55856	195.831	1.10018	1.01675	11.1692	9.68531	0.560503	1.36754	1.21582	0.340718	0.141285	1.03555	1.6074	0.818396	0.497623	0.255237	0.729959	0.0781371	1.29885	1.03865	1.17911	0.414799	22.6064	0.727483	17.7564	2.23795	1.28682	1.24379	6.41901	0.840373	0.20625
TCGA-AG-A008	1.16164	0	5.5291	0.980188	4.11231	1.71597	1.05893	1.44724	0.0127297	0.200289	0.557713	0	1.01958	0.126356	5.38964	2.59577	0.420156	0.27044	0.796577	43.9052	2.50699	3.54187	7.34131	8.54271	0.411059	1.25365	0.701625	0.642535	0.141293	1.20618	1.21829	1.13721	0.136854	0	0.30703	0.429779	0.105838	0.666507	1.93567	3.23562	11.8071	3.5031	15.5809	0.1313	1.65152	1.12392	5.08866	0.862832	0.138106
TCGA-EI-7002	0.99726	0	5.2652	0.345859	1.12991	1.7075	1.4307	1.30153	0.841671	0.583496	0.282569	0.432129	0.553477	0.120036	1.21906	3.53933	0.512385	0.565208	2.72424	82.4666	2.29947	0.637524	18.7195	2.18297	0.374878	1.65145	0.8165	0.244158	0.773142	0.509265	0.839666	0.756226	0.208014	0	0.987198	2.12306	0.321741	0.904527	1.80473	3.02649	12.5662	5.76067	11.6968	2.02067	1.0041	0.204255	6.91463	1.03045	0.442324
TCGA-CK-6751	1.41918	0	5.70207	0.106383	2.53145	0.213597	0.357557	0.390939	0.477111	0.777737	0.219703	0.191994	0.0737725	0.0639979	1.10492	1.72719	0.193008	0.342437	1.53314	48.8119	1.79518	2.17158	0	3.75562	0.124918	0.0423307	0.303541	0.0542394	0.887387	0.271518	1.00676	0.143995	0.27726	0	0.741648	0.0870711	0.482451	0.361691	1.10168	0.630309	8.69229	6.4547	21.2879	1.23029	0.525783	0.17325	2.36528	0.124861	0.749453
TCGA-AF-2690	0.980822	0	7.7699	0.23524	1.21469	0.314103	0.282376	0.439953	2.96036	0.640912	0.446162	0.181949	0.419478	0.0606498	0.923921	2.80948	0.483072	0.519234	0.535289	39.5212	2.07471	3.57909	0.803584	4.53446	0.0789217	0.320929	0.280645	0.0514018	0.257714	0.450298	0.568195	0.181949	0.262755	0.179694	0.997591	1.32025	0.81282	0.525578	1.3314	1.71236	9.63266	10.1467	6.23833	4.56917	0.81536	0.304917	6.09081	0.414151	0.407207
TCGA-G4-6322	2.16986	0	6.09842	0.161583	2.28751	0.665638	0.814631	0.408231	0.186065	0.128401	0.452882	0.656136	1.17654	0.0486027	0.740399	5.8537	0.195438	0.780181	2.24695	46.0964	2.22789	1.57749	0.288674	4.98824	0.189736	0.675102	0.371083	0.164767	0	0.412404	1.1592	0.437424	0.236883	0.0720002	0.635914	0.529003	0.0407104	0.320463	0.575685	0.159561	9.44963	2.62522	13.0388	0.681811	0.798602	0.733051	2.34757	0.924542	1.56331
TCGA-AA-3875	1.50411	0	2.41799	0.293229	2.20809	0.933876	2.62814	0.673479	0.542029	0.466025	0.432556	0.793803	0.203343	0.617402	1.43319	0.923725	0.231897	0.943875	0.815517	101.499	2.53441	3.38319	5.1849	7.78243	0.114772	0.233357	1.20398	0	0.749565	2.43229	1.15682	0.661503	0.191056	0.522642	1.25292	0.359998	0.591025	0.531705	2.81375	3.01141	17.3252	2.57175	23.1313	2.93285	1.18574	2.11481	8.22812	1.29061	0.0275434
TCGA-D5-6920	1.03288	0	2.86948	0.459556	3.0107	0.328116	1.0619	0.692668	0.104444	0.424526	0.610121	0.388772	0.239013	0	0.68437	1.31545	0.216458	0.998505	1.26358	36.9014	1.56043	3.21193	5.56156	3.56129	0.57335	0.171432	1.46316	0.263593	0.74194	0.769722	1.23835	0.933052	0.308786	0	1.05609	0.352624	0.39077	0.468732	1.03968	0.612636	10.4791	2.89899	13.1268	2.37004	1.02595	0.24056	3.03225	0.328684	0.453251
TCGA-AA-3842	3.08493	0	12.5422	0.443088	1.90185	0.460157	0.372309	0.381627	0.654562	0.316888	0.0980431	0	0	0	1.42121	2.73794	0.23189	0.641817	0.504123	51.7631	0.547096	0.294936	2.34433	5.53764	0	0.132232	0.185013	0	1.386	0.84816	0.507243	0	0.324786	0	1.04627	0.407986	0.167452	1.43113	1.54705	0	7.63254	6.30692	24.8919	1.97351	0.373279	0.309254	4.63699	0.195019	0.280934
TCGA-AD-6965	2.20548	0	2.80427	0.0818696	4.43879	1.828	1.16946	1.24104	0.409348	1.2491	0.507233	0.110815	0.468381	0.0369384	0.600222	0.595164	0.725533	1.26495	1.98714	61.8372	1.46576	0.871928	12.4548	7.04105	0.384534	0.29319	0.615329	0.250447	1.28872	0.470145	1.32943	0.554076	0.840152	0.109441	0.441874	0.804093	0.680684	0.6402	2.20512	0.582084	18.7706	3.91975	27.3736	1.1899	1.71048	0.65712	6.27049	0.612574	0.772858
TCGA-AA-3815	2.75342	0	10.9819	0.322854	1.31283	0.419114	0.678203	0.0556141	0.271491	0.192416	0.142877	0.2185	0.251873	0	4.88191	1.81896	0.112644	1.0912	2.38762	17.9505	1.19592	7.09183	2.06313	4.81989	0.0947761	0.1927	0.235916	0	1.23794	1.39052	0.693711	0.764752	0.0788846	0.215792	0.326726	1.09001	0.488053	1.34465	2.20849	0.573864	11.1228	4.8392	14.1945	0.22705	0.979155	0.28167	3.73144	0.568399	0.841551
TCGA-D5-5539	1.63288	0	3.20601	0.16357	2.83789	0.563971	0.439811	0.563522	0.597772	0.452329	0.231638	0	0.204173	0.0885602	0.17988	8.70418	0.273933	0.442273	1.24067	84.7957	1.6965	0.435512	3.82587	6.25333	0.307309	0.312412	0.430285	0.20015	0.475341	0.125242	0.990999	0.221401	0.47959	0.0874624	0.110354	1.48603	0.0989061	0.155713	0.979039	0.659011	7.55683	6.3921	24.4686	3.9571	0.5071	0.319658	4.24371	0.20158	1.16154
TCGA-NH-A6GC	1.06575	0	2.28092	0.724754	2.97228	3.83284	1.03058	1.99751	1.31773	0.239229	0.937535	0.754611	0.811875	0.0503074	1.63492	9.24051	0.140049	1.07673	3.59436	40.5089	1.78975	0.890628	9.68416	8.43733	0.130927	0	0.55869	0.938002	0.967579	0.747021	1.20968	1.88653	0.708332	0	0.80867	0.342224	0.674214	0.246409	4.62401	0.132126	10.775	3.41467	38.4913	1.0978	1.27749	0.700397	6.37291	1.37411	1.03687
TCGA-DM-A1D7	1.10959	1	14.1974	0.347011	2.57576	2.0799	2.37429	0.683147	0.189279	0.484533	0.526518	0.805199	1.39227	0.0670999	2.86211	3.54974	0.439319	0.239356	5.77177	76.6882	3.48894	3.10178	9.65346	7.18232	0.145525	0.53259	0.740004	0.227473	0.150064	1.47084	1.26423	0.704549	0.339148	0.0662681	1.02007	0.639041	0.974203	0.219106	1.52598	0.93989	20.4133	2.43761	20.1806	1.46424	1.6371	0.345995	4.80023	1.65823	2.36083
TCGA-AA-3812	2.92055	0	2.1518	0.119029	0.64535	0.148337	0.600092	0.246044	0.357087	0	0.316054	0.322225	0	0	1.30898	2.07672	0.0664467	1.83909	0.812551	38.008	0.440907	0.633842	4.20392	1.08518	0.279535	0.142088	0.0994021	0	1.05693	1.13923	0.218021	0	0	0	0.200761	1.02293	0	0.445155	0.712444	0.564189	4.4903	12.6299	6.84836	1.22772	0.401103	0	6.15985	0	1.03979
TCGA-D5-6932	0.947945	0	15.8967	0.278976	1.06438	1.14602	0.677191	0.854324	0.408601	0.679839	0.384095	0.503479	0.580377	0.111884	0.511324	5.38563	0.886827	0.179599	1.81038	107.376	1.83712	1.73317	8.20017	7.32879	0.109194	0.0740047	0.59538	0.047412	0.588021	0.534016	0.659483	0.419566	1.8177	0	0.941071	2.47361	3.42064	0.895795	0.424076	0.88155	22.6877	5.09404	28.6696	1.39515	1.42058	0.865383	6.53062	0.463863	0.856017
TCGA-AG-3898	4.00274	0	7.96251	0.631595	2.06889	1.44304	1.72479	0.543986	0.674658	0.451705	0.559018	2.13725	0.492735	0.356208	5.49872	1.43484	0.451745	0.152478	1.55696	31.8141	1.85215	1.47145	0	5.36235	0.185409	0	1.0549	0.8453	1.72073	1.96463	1.64075	1.7098	0.308642	0.422151	0.506009	0.193853	0	1.31526	2.65527	0.467768	21.7458	5.10802	24.5117	0.666264	1.91551	0.771439	7.60847	0.90346	1.11237
TCGA-AA-3844	1.24384	0	7.23175	1.00385	3.49887	1.44464	1.446	0.444655	0.202074	0.546999	0.571178	1.35877	0.820444	0.129407	7.88539	0.573389	0.320223	0.276969	0.815809	66.0828	1.41656	8.78209	3.92187	4.4453	0.336787	0.427974	1.19761	0.219349	0.89717	0.549022	1.13657	0.776441	0.77087	0	0.556321	0.440155	0.433574	0.585085	2.08459	1.44445	15.7359	1.70105	15.023	0.403412	1.73971	0.750686	3.82617	1.0099	0.14144
TCGA-G5-6233	1.52329	1	11.2475	0.767157	2.26874	1.44857	0.703212	0.985109	0.180694	0.914427	0.925912	0.849592	1.7048	0.251731	0.9587	2.83919	1.16311	0.673474	2.75075	117.162	4.86534	1.39268	1.73476	5.9927	0.818925	0.0416262	0.684341	0.373356	0.971139	0.867746	1.83017	1.32159	0.579371	0.186458	2.31731	0.085622	0.316281	1.05516	1.42127	4.42137	27.2226	4.12122	17.186	1.30791	3.38421	0.827495	5.96718	4.02115	0.579757
TCGA-F4-6809	1.10411	1	3.02995	0.176916	1.14571	1.59847	1.09014	0.995523	1.42069	0.745104	0.652444	0.39911	0.582752	0.159644	0.70257	6.64496	0.58434	0.797267	1.85631	96.7992	1.78396	1.09911	14.5755	8.68298	0.51935	1.12634	1.41588	0.405904	0.404637	0.620864	0.749887	0.478932	1.26799	0.0788325	0.616686	1.77381	1.20349	0.701746	2.14306	1.4675	18.5035	5.01101	33.8337	2.01834	1.47055	1.35827	5.32379	0.54507	0.465304
TCGA-AA-3511	0.580822	0	6.47186	0.20612	1.09093	0.788965	0.742261	1.42023	0.594267	0.42118	0.833986	0.239138	0.336921	0.159426	0.971457	2.20482	0.456148	0.511827	1.04972	57.7741	1.67245	1.25441	7.04107	4.52347	0.829823	0.562402	1.17419	0.450387	0.392199	0.732745	0.80487	0.43842	0.37412	0.0787246	1.22175	0	0.489638	0.780875	1.46032	1.36081	8.41993	3.59436	22.9831	2.0708	0.773961	0.369929	7.65305	0.673926	0.165953
TCGA-A6-6650	0.761644	0	0.687279	7.6447	1.46863	3.20068	1.01158	10.5349	1.182	0.774898	1.81143	0.651813	1.31489	25.638	125.664	0.262556	3.35189	3.13892	2.1459	42.5921	5.05404	1.92325	11.2503	27.467	20.4978	2.08382	13.3087	28.6339	0.485912	0.460897	4.04979	4.80712	7.47148	49.4065	0.426414	1.92143	0.18199	4.72753	0.874994	0.213988	25.6632	1.37609	4.63952	4.51546	6.49097	5.33562	3.28125	6.57045	0.441024
TCGA-DM-A28F	2.99726	1	3.17572	0.206989	2.43154	1.05332	1.30443	1.12315	0.115255	1.52969	1.05342	0.280171	0.592098	0.326866	1.0433	4.60826	0.639133	0.59965	2.98302	44.1007	3.92948	1.9978	1.84541	6.94299	0.303815	1.26633	0.577994	0.39575	0.783229	1.33724	0.523132	1.05064	0.682758	0.345872	1.30919	0	0.704028	0.316683	2.21974	0.245278	25.1148	4.72074	24.9137	0.41244	2.94698	0.487579	7.76013	0.546619	0.590574
TCGA-AA-A03J	3.4137	0	5.26587	0.664134	0.400088	0.689719	0.86807	0.101691	0.120752	0.175917	0.457192	0.799061	0.460552	0.266354	10.5496	4.61345	0.319254	0.285038	1.90304	131.503	1.09337	2.75068	6.16573	3.27412	0.0866495	0.616618	0.415968	0.11287	1.51899	4.94389	0.842172	0.199765	0.576965	0.591866	0.323603	0.543574	0.334653	0.752662	1.28299	1.74886	9.59708	3.53305	24.1924	0.207582	1.1936	0.360525	14.257	0.0649577	0.353504
TCGA-CM-6170	0.663014	0	6.48141	0.216745	2.15444	1.3763	0.31221	1.15208	0.751571	0.900546	0.657733	0.335288	0.322081	0.139703	1.19179	2.63361	0.678441	0.478411	2.11373	106.526	0.64994	1.15419	4.61688	6.21046	0.254509	0.443545	0.724023	0.426244	0.462407	0.0592706	0.628227	1.04777	0.121048	0	0.814708	0.950353	0.561686	0.863239	0.794278	0.146765	15.5958	3.28549	19.2267	5.77776	1.10601	0.345777	6.85823	0.708666	0.488621
TCGA-AA-3837	3.24932	0	9.20475	0	4.24609	0.516699	0.929014	0.571358	0.402046	0.263574	0	1.49653	0.575033	0.249421	7.59923	1.00469	0.231452	1.60151	0.628963	53.5788	2.04773	4.41568	10.1041	3.56998	0	0	0.577074	0	1.33875	0	0.486812	0.374132	0.810431	0	0.186481	0.339346	0.417839	0.469877	1.41808	0.982611	15.6171	8.34564	10.8021	2.07345	1.11772	0	5.34026	1.45988	0.623119
TCGA-AG-3584	2	1	10.9801	1.79667	1.93574	1.34918	2.20644	1.33319	0.314103	0.164736	0.244648	0.748274	0.43128	0.0623562	3.16639	2.31082	0.395402	0.400382	0.995871	48.1777	1.96243	1.10394	0.13295	2.41502	0.243427	0.329958	0.880049	0.211392	1.11564	5.42333	1.53835	0.65474	0.20261	0.18475	0.233104	0	0.104461	0.610848	3.52554	4.58558	16.5339	4.20268	17.2536	0.51837	1.3506	0.578762	11.3005	0.425804	0.0584182
TCGA-5M-AATE	3.28767	0	4.70052	0.458375	3.45168	0.634711	0.941488	1.36862	0.351884	0.582793	0.495859	1.103	0.317866	0.413624	1.58693	3.33223	0.483335	0.0983644	2.6269	120.467	3.83602	0.406816	9.2249	8.12581	1.25589	2.1887	1.45674	0.545306	0.164452	2.04732	1.11228	1.24087	0.248883	0.408497	0.515413	2.43858	0.615927	0.70995	1.77099	2.83653	22.24	1.93319	33.505	4.15483	2.67736	1.24415	6.39596	1.03115	1.50696
TCGA-AG-3728	2.49863	0	16.8244	1.56994	0.970656	0.274598	0.833155	0.170801	0.330515	0.118189	0	0	0	0.0745617	0.757234	4.98567	0.161443	0.957506	0.689412	29.2449	0.204049	3.96006	0.783516	0.86632	0.485125	0.197272	0.310517	0.126385	1.46742	1.73985	0.256127	0	0.161513	0	0.306605	0.811548	0.499633	0.758508	1.17755	0.195827	3.45872	7.87655	6.63774	0.0774794	0.33413	0	7.71598	0	0.558823
TCGA-AA-3930	0.167123	1	4.05072	1.01365	2.5647	2.44226	0.681382	0.768279	0.479179	0.434965	1.16632	0.274406	0.738073	0	3.90154	0.957955	1.0044	0.391541	0.845737	106.138	2.1277	2.69889	0.668646	11.1667	0.476102	0.484008	0.380928	0.310085	0.45004	1.74629	1.2711	1.78364	0.198136	0	0.341935	0.248892	0	0.413556	0.635607	0.120116	41.2775	7.08297	8.69306	2.28115	3.96231	0.495233	3.77691	2.40917	0.285641
TCGA-CM-6677	0.419178	0	8.91407	0.151109	4.23294	1.28682	0.931116	1.18001	0.586118	0.552357	0.445815	0	0.471546	0.136356	1.38481	2.12378	0.836518	0.972808	2.29231	84.5165	3.98034	0.402334	9.21326	4.53859	0.532308	1.62344	0.57838	0	1.0165	0.482087	1.00067	0.613602	0.147685	0.403997	0.883541	0.185517	0.0761427	0.479503	1.39257	0.119374	23.9993	6.10502	26.0275	1.32245	0.746833	0.738264	6.02429	0.975455	1.90197
TCGA-A6-6648	0.942466	0	2.20282	0.176581	1.61337	0.798736	1.61563	1.66282	0.0374565	0.83256	0.555697	0.212455	0.653077	0.106228	1.15075	0.698894	1.28694	1.6673	1.11614	35.1736	1.69579	1.46271	9.03261	7.05067	0.599	0.257631	0.897073	0.330109	0.791902	0.262898	1.46238	1.5403	0.17258	0.209821	1.69432	1.373	0.207615	0.687074	0.939482	0.511488	16.8005	3.32588	12.2469	5.28005	1.41487	0.561448	5.7627	0.794467	0.785094
TCGA-CM-4747	0.668493	0	3.8106	0.186277	0.0841628	0.522323	0.782605	0.320876	0.355619	0.177629	0.494615	0.252136	0.290646	0	6.31626	3.1823	0.0129984	0.179882	2.40194	35.3289	0.690006	0.743958	6.09262	2.57572	0	0.889455	0.213897	0.14246	0.150369	0.891428	0.203406	0.252136	0.091028	0	0.439858	0.914771	0	0.981649	1.35387	1.43477	6.61005	11.0478	15.874	0.349337	0.313857	0.32503	10.1327	0.0819872	0.44618
TCGA-DM-A28G	5.06575	1	3.86239	0.233634	3.114	1.10398	0.932486	1.32809	0.379655	0.877224	0.697905	0.474355	0.516426	0.210824	2.3552	3.43934	0.362741	0.84605	2.17083	66.6679	1.91115	1.32188	0.276925	7.08234	0.651556	0.55779	1.56088	0.491362	0.483281	0.782638	0.932	1.54165	2.14069	0.156158	0.837375	2.00783	0.662212	0.248228	1.58153	0.519097	20.0371	4.2451	12.3643	6.54483	1.51555	1.03954	3.24435	1.20826	1.11099
TCGA-AG-3892	1.08493	0	10.3761	0.557207	4.24387	0.132268	0.401313	0.274238	0.260512	0.189764	0.140908	0.215489	0.165601	0	1.60487	2.66189	0.2444	1.07616	0.966036	39.2176	0.982859	6.57019	0.120331	2.22554	0.0934697	0	0.299139	0	2.92368	0.304744	0.414975	0.215489	1.08916	0	0.29537	0.0977264	0.120331	0.703651	1.61085	1.13191	20.4033	5.01284	18.4059	1.34353	1.44849	0.22223	3.68001	0.210211	3.746
TCGA-CM-6166	1.16164	0	7.268	0.0434017	2.62768	0.540884	0.364687	0.687818	0.402452	1.98656	0.499387	0.939947	0.180585	0.0391645	3.10242	1.89309	0.411886	0.335294	1.51433	153.337	10.1284	0.346678	12.6865	11.6267	0.101927	0.932576	0.308084	0	0.61312	0.498478	0.914219	0.469973	0.848366	0.232074	0.995569	1.27883	0.721706	0.368903	1.27416	1.6972	28.6416	9.45391	21.0607	5.29061	3.0421	0.575553	4.50213	0.993338	1.61441
TCGA-AA-A00J	1.50411	0	8.83686	0.224699	1.01523	1.4468	1.13284	0.722516	0.463017	0.57138	0.928102	0.202762	0.233731	0.135175	3.29474	1.14344	1.01394	0.578629	1.13623	63.7998	4.34662	0.997123	10.7049	14.0441	0.703596	0.35764	0.375297	0.343689	0.0302309	1.29036	1.09225	1.31795	0.512419	0.200249	0.151596	3.95406	0	0.432908	1.21684	0.53253	13.9987	6.33213	10.2449	0.561857	2.01918	1.30691	2.70467	1.38458	0.46434
TCGA-AA-3841	3.07945	0	7.93961	0.606878	0.685492	0.252103	1.01987	0	0.234475	0.361689	0.26857	2.05361	0.789087	0	3.33697	2.64708	0.381131	1.46511	2.07142	23.0198	0	3.23169	5.83804	2.35147	0.178153	0.181112	0.190053	0	0.55113	3.19464	0.438225	0	0	0.81126	0.716514	0.931333	0.688055	0.206332	2.89731	0.719139	6.40304	16.295	13.9997	0	0.511263	0	7.50264	0.133554	0.384783
TCGA-CA-5254	0.186301	0	2.8855	0.292627	2.40388	0.884072	0.894118	0.843175	0.592509	0.913226	0.706365	0.144032	0.442746	0.168037	0.536344	2.10796	0.798216	0.102757	2.28011	50.1313	1.80658	0.920794	0.00731171	4.66472	0.187424	0.825657	0.322131	0.162759	0.0644233	0.814758	0.948296	0.468102	0.181998	0.213369	0.206398	0.685858	0.0804288	0.443183	3.00258	0.535898	15.3971	11.0041	21.4858	0.848116	0.770944	0.594149	3.21229	0.88986	0.367324
TCGA-AA-3544	1.16712	0	20.1488	0.0837016	3.02542	0.191237	0	0.173019	0.486991	0.0798157	0.0740834	0.453179	0.522395	0	1.53413	2.19054	0.292035	0.484969	2.28555	63.1365	1.86028	7.57723	0.437104	3.16688	0	0	0.0349499	0	0.405402	3.52488	0.200487	0.113295	0.081805	0.223781	0.479997	0	0.885711	0.654526	0.906558	1.2894	37.4586	6.10145	18.8088	0.941825	0.338468	0.175259	5.71774	0.368401	0.967052
TCGA-DM-A0X9	9.97534	0	1.58729	0.151659	2.03608	1.19701	1.01946	1.28383	0.128024	0.6921	0.728686	0.938418	0.450727	0.0195504	0.714779	1.87427	0.789171	0.46028	1.16677	85.2181	7.22282	2.53817	7.50901	14.732	0.483366	1.60349	0.972503	0.198831	0.5684	0.953861	1.86668	0.821115	0.465842	0.231696	0.358114	1.86192	0.262012	0.294642	0.98185	3.20916	17.6638	3.71	17.7572	0.426623	1.79601	0.907289	5.03797	1.48758	0.952416
TCGA-AA-3514	0.0849315	0	11.473	0.413423	1.3698	0.300545	1.27374	0.0949537	0.200448	0	0.426902	0	0.143347	0.0621768	1.13662	2.1539	0.125011	1.06462	0.836216	36.5312	0.255234	0.36692	6.66629	1.29827	0.161818	0.246757	0.143855	0.105392	0.417163	2.76981	0.684439	0	0.336713	0	0.418381	0.676748	0	0.257692	1.98355	0.489899	5.13937	13.8795	3.8148	0.323049	0.371507	0.0480915	4.73859	0.0606541	0.893169
TCGA-A6-6140	0.975342	0	12.2523	0.237211	1.07176	0.858704	0.626432	1.23752	0.0616134	0.226199	0.209953	0.917369	0.669738	0.0917369	0.807441	4.38502	1.26746	0.32724	1.15666	48.5617	1.12973	2.7068	4.9597	4.28925	0.278541	0.889949	1.01879	0.20733	0.533424	0.713539	1.38464	0.0458684	0.0993585	0.0905997	2.69777	0.166414	0.0512269	1.42865	1.58402	0.321247	9.33977	1.38859	14.3102	2.63737	2.19251	0.42573	10.0156	0.238641	0.792589
TCGA-G4-6306	3.72329	0	11.7104	0.256411	2.17799	1.00124	0.947986	0.530024	0.0466201	1.36924	0.453892	0.277653	0.853493	0.138826	0.845937	3.6162	0.608339	0.792347	3.42298	64.7023	1.89959	2.73082	0.0352374	6.00785	0	0	0.471087	0.156877	3.66362	1.07981	0.610555	0.277653	0.551321	0	1.15904	0.251837	1.62797	0.976381	4.16571	0.607684	9.58461	3.07464	28.5589	0.76938	1.90091	1.10956	9.36528	0.541707	1.3873
TCGA-D5-6530	1.70137	0	6.51262	0.0360253	0.911499	0.351683	0.605411	0.49645	0.163751	0.154587	0.382627	0.780196	0.11242	0	0.132059	1.41421	0.296633	0.904503	1.53021	72.1696	2.26856	5.94698	0	5.09083	0.253811	0.172017	0.353499	0.330615	0.770644	0.620636	1.34003	0.731433	0.211254	0.0963155	0.0850669	0.574969	0.217835	0.698148	1.06787	0.213446	11.8962	8.48424	14.7828	2.19571	0.922622	0.427445	2.70122	0.443968	0.781682
TCGA-AA-A00O	2.25205	0	11.5477	0.485467	0.501352	1.58453	4.31228	1.09908	0.926801	0.72746	0.736597	1.31421	0.28856	0	11.9487	1.21	0.280686	1.07155	1.10468	73.6381	4.45285	0.923272	14.8776	14.3317	0.651485	1.07624	1.37552	0.424312	0.335903	0.132754	0.669352	1.50196	0.542248	0	0.79542	1.02173	1.04839	1.72127	2.51041	3.45162	11.4447	2.782	1.43045	1.75582	0.70111	0.387236	10.9267	0.061049	1.91523
TCGA-AA-3979	2	0	5.10825	0.348623	1.32311	0.666178	1.87478	1.05693	0.152126	0.5319	0.308562	1.88752	0.435162	0.188752	1.40575	0.810999	0.369769	0.538648	0.899063	53.197	3.18538	0.371291	0.29704	3.7187	0.163745	0.249696	0.334809	0	1.18197	2.66934	0.559968	1.6044	0.0681447	0	3.5986	0.0856012	0.73781	0.521524	2.08667	4.29636	20.7423	2.10522	19.6796	0.457656	1.69169	1.26527	4.44222	0.920649	1.4343
TCGA-AZ-4315	4.86575	0	21.1577	1.57649	2.39927	0.0861697	0.139438	0.228685	0.497839	0.435166	0.514071	0.898472	0.517849	0	3.34573	0.9651	0.0578987	0.640999	1.38457	51.0749	0.922048	3.31381	2.07528	2.31982	0	0.0990474	0.207875	0	1.00469	0.317655	0.362412	0.449236	0.567652	0	0.447831	0	0.125429	0.733461	0.993267	0.589931	16.4081	13.5283	18.8253	2.64528	1.17433	0	2.97713	0.584312	1.84713
TCGA-AZ-5407	5.11781	0	4.21147	0.126465	2.057	0.33272	0.141684	0.319507	0.0766454	0.462276	0.0746218	0.114118	0.219247	0	0.309057	2.5742	0.264742	0.732742	1.11911	72.2896	1.3533	8.97918	0	4.21476	0.0989991	0.0503215	0.272831	0	1.02087	0.484159	0.599891	0.114118	1.02999	0.112704	0.838989	0.103508	0.191175	0.300977	2.89564	0.299717	18.0303	8.43684	16.7032	0.751031	0.909142	0.235377	2.90874	0.371078	0.142548
TCGA-AA-3864	4.41644	0	7.13361	0.140139	1.77288	0.291076	0.35326	0.241401	0.503228	0.434308	0	0.379373	0.218658	0.0632289	1.15585	1.01877	0.215136	0.135329	1.48814	67.083	2.16293	1.30595	0.182958	6.3137	0	0.0836441	0.219434	0	1.15954	0.670638	0.779937	0.189687	0	0	0.378186	0	0	0.40499	0.4194	0.415157	19.4328	4.47306	17.7994	3.41656	1.46395	0.489052	2.90093	0.678485	3.69236
TCGA-AA-3532	2.41644	0	11.3562	0.638256	2.01862	0.755642	0.858082	0.483756	0.609245	0.213019	0.395439	0.345566	0.265564	0.345566	1.05285	1.39197	0.409745	0.739615	0.968234	19.589	1.49734	3.39878	3.36817	3.23922	0.0749459	0	0.186555	0.0976245	1.49415	1.34393	0.660975	0.691133	0.436656	0	2.28222	0.548513	1.35078	0.347201	1.41895	0.151264	8.31181	3.96434	24.4584	1.55605	1.11841	0.178188	4.22787	0.337103	0.701442
TCGA-AA-3495	3.08767	0	23.4607	1.19447	2.62131	0.584801	0.716905	0.76424	0.349034	0.732225	0.302061	0.461938	0.62124	0.307959	8.7572	1.55061	0.369122	0.823905	0.388288	52.8882	2.10693	6.58785	6.51914	4.95233	0.300553	0	0.356255	0	0.929785	1.30655	0.847499	0.692908	0	0	1.15123	0.209494	1.16078	1.85649	1.79953	0.101102	18.9296	2.17127	15.1897	3.68011	1.43754	0.774133	6.20111	0.300417	0.336595
TCGA-AZ-4616	0.427397	1	12.1391	0.518103	6.67148	1.20391	1.03393	0.557795	0.556372	0.633001	0.315265	1.05192	0.471561	0.1461	2.37403	4.26078	0.347975	0	1.49824	85.1295	3.6384	2.24165	2.54987	6.70641	0	0.541164	0.358306	0.049529	1.59451	1.30167	0.57715	0.482131	0.41142	0	0.819243	0.198774	0.195802	0.198168	2.10431	0.575571	24.2808	11.4671	39.687	1.09308	3.25174	0.565016	3.46325	1.08317	1.47823
TCGA-4T-AA8H	0.956164	0	1.47724	0.517527	1.96415	0.999683	0.521828	0.855821	0.0799814	0.24675	1.00773	0.560401	0.484495	0.0934003	0.948555	2.29497	0.476692	0.399809	1.53092	42.5603	2.55603	0.137794	3.29292	5.93716	0.486156	0.370671	1.09128	0.633267	0.731091	1.48598	1.02815	1.2609	0.15174	0.138364	0.645937	0.953055	0.86057	0.193549	2.38961	0.490608	18.3556	4.97795	16.7982	1.11613	1.4998	0.758537	2.46398	0.911129	0.787515
TCGA-CM-4748	0.586301	0	5.03641	0	0	1.09944	1.7791	0.729448	0.962416	0	0.937006	0	0	0	7.76149	1.53922	1.32972	0	1.60598	56.7994	2.61432	0	3.3462	4.50414	0	0	0.442047	0	0.854587	0	0.820391	2.86591	0	5.66076	0	0	0	1.0798	2.11219	1.25449	6.92976	6.39288	9.19398	2.97805	2.14047	0	4.62641	0	3.28156
TCGA-G4-6299	6.2137	0	8.45955	0.106267	1.37638	0.750455	0.833393	0.488143	0.724549	1.89156	0.31352	0.287677	0.810615	0.0639283	0.519395	2.34333	0.514129	0.205239	3.17041	66.1392	1.79323	2.26354	8.27065	5.85606	0.332752	0.295993	0.894842	0.216722	0.714857	0.745862	1.07554	0.239731	0.311578	0	1.56533	0.7393	0.374832	1.74627	0.68654	0.0839498	23.9495	22.903	8.53668	0.963233	1.36077	0.469739	2.92487	0.966622	1.14791
TCGA-AG-A015	3.00274	0	2.73554	0	0.866	1.17623	0.585649	0.480245	0.0950435	0.54001	0.385559	0	0.996874	0.235852	5.74865	1.90007	0.607946	0.841324	0.991243	33.9519	1.93633	0.23197	4.59762	6.1161	0.306908	1.87202	0.363786	0.399778	0.632961	1.33417	0.889968	1.53304	0.425745	0.232929	0.352672	1.17658	0	0.236968	0.943617	0.412958	7.98407	1.35285	27.7115	2.6142	0.411022	0.364846	4.46862	0.690229	0.196407
TCGA-DM-A1D4	7.72877	1	10.1051	0.406397	5.28815	2.08775	1.36591	0.989403	0.0197041	0.775058	0.671435	0.733441	1.49365	0.220032	4.02229	3.97855	0.635227	0.26163	4.21277	67.7099	2.97729	3.02975	0.00372329	8.13887	0.349948	0.582152	0.83715	0.580164	0.196835	0.62234	1.04214	0.843457	0.582543	0	0.210205	0.831558	0.286693	0.147382	1.69115	0.321048	29.5748	2.90985	27.4703	0.203238	3.30499	1.32367	6.71134	2.19414	1.52694
TCGA-AG-A026	0.161644	1	5.567	0.131482	0.772271	0.955828	0.552394	1.04184	0.992089	0.877643	0.290933	0.88984	0.341916	0.177968	5.18124	8.12454	0.42204	0.253936	1.89485	46.3649	1.62345	0.175038	13.6692	6.8926	0	0.313907	1.00194	0.50277	0.477616	1.63594	0.727122	0.533904	0.0642513	0.175762	0.975762	0.968524	0.0993793	0.55878	2.0424	2.25915	11.7887	4.14001	19.7685	0.554796	1.15197	1.65182	9.4504	0.231479	0.370508
TCGA-AA-3989	0.663014	1	8.57018	0.145279	1.57534	0.588415	0.488288	0.200203	0.264144	0.207801	0.25717	0.393287	0.226677	0	1.7308	1.74261	0.111513	0.561167	1.9284	67.2384	0.896904	0.967032	6.74819	5.80573	0.255886	1.12725	0.394302	0.333317	3.01982	1.52951	0.6192	0.393287	0.709936	0.388411	0.686099	0.0891798	0.439231	0.790293	0.414077	0.602535	14.2895	3.88515	20.7389	1.02169	1.12599	0.152096	5.64708	0.383655	1.82178
TCGA-F4-6460	1.11507	0	5.95783	0.298177	3.90691	3.11986	0.87691	1.56658	1.35535	0.284334	0.36288	0.201799	0.891713	0.0336332	1.4346	9.1312	1.08715	1.29573	2.57265	61.7766	6.25886	2.08401	1.61347	2.96199	0.481425	2.13565	1.47849	0.741124	0.180524	0.856155	1.1002	0.706298	1.42067	0.498244	0.7921	1.32701	0	1.01377	2.05031	3.13584	14.8247	2.99026	13.3523	3.25029	1.20575	0.468253	8.48698	1.11553	1.83804
TCGA-AG-A02G	3.24658	1	7.13805	0.218508	1.77706	1.07412	0.979221	0.351305	0.0860791	2.95182	0.193399	0	0.227291	0.0657252	2.26948	3.44171	0.762376	0.422015	1.27066	90.3422	2.78793	0.58179	10.6402	5.94319	0.171053	0.347786	0.745119	0.445626	1.4405	0.975961	0.584957	1.08447	0.213557	0.194731	1.5479	3.39801	0.22021	1.41152	0.602037	1.12202	12.5591	4.58683	6.79992	5.32717	1.17813	0.406688	12.3802	0.384694	0.328397
[truncated: 392 more columns]
